# Supplementary material for: Hepatic Gene Expression Changes throughout the Day in the Fischer Rat: Implications for Toxicogenomic Experiments
Source: Oxford University Press journal article supplement (doi:10.1093/toxsci/kfi166), 2005-04-06
Supplement: kfi166_Supplementary_Data.zip [file kfi166_Supplementary_Data.zip]

Archive with 5 entries (5 files):
- kfi166Summary.pdf
- kfi16612hrOffsetGenes.pdf
- kfi166Summary.doc
- kfi166RT_PCR_Suppl.pdf
- kfi166suppPeriodicityGenes.pdf
