# Supplementary material for: Hepatic Gene Expression Changes throughout the Day in the Fischer Rat: Implications for Toxicogenomic Experiments
Source: Oxford University Press journal article supplement (doi:10.1093/toxsci/kfi166), 2005-04-06
Supplement: kfi166_Supplementary_Data.zip [file kfi166_Supplementary_Data.zip › kfi166RT_PCR_Suppl.pdf]

\*\*\* AB Assay Information File

\*\*\* Begin Assay Information

| Product Type                                   | Assay ID      | Lot Number | Vial ID  | Well Location | Context Sequence=nucleotide sequence<br>surrounding the probe | Gene Symbol |
|------------------------------------------------|---------------|------------|----------|---------------|---------------------------------------------------------------|-------------|
| Assays-on-Demand(TM), Gene Expression Products | Rn00588658_g1 | 139171     | 20440415 | A01           | GCACGAACTGCAAGAAGAGCTGCTG                                     | Mt3         |
| Assays-on-Demand(TM), Gene Expression Products | Rn00587206_m1 | 114527     | 18490336 | A02           | ACCTTGGGAACACGTGCTTCATGAA                                     | Usp2        |
| Assays-on-Demand(TM), Gene Expression Products | Rn00588855_m1 | 114528     | 18987362 | A03           | GGATCCTGAGAAGGGAATGTGGGGC                                     | Bdh         |
| Assays-on-Demand(TM), Gene Expression Products | Rn00821759_g1 | 168716     | 25644881 | B01           | TCCTGCAAGAAGAGCTGCTGCTCCT                                     | Mt1a        |
| Assays-on-Demand(TM), Gene Expression Products | Rn00577590_m1 | 114457     | 18416605 | B02           | AGATCAGAGGGCGACGGCTATTTTG                                     | Arntl       |
| Assays-on-Demand(TM), Gene Expression Products | Rn00567492_m1 | 114447     | 18517497 | B03           | AATCTTAAAGATGGGGGCTGAAGCA                                     | Chk         |
| Assays-on-Demand(TM), Gene Expression Products | Rn00497539_m1 | 114440     | 18543638 | C01           | AGAACCGGCCAGCTGTCTCCTGAAG                                     | Dbp         |
| Assays-on-Demand(TM), Gene Expression Products | Rn00583910_m1 | 114523     | 18366158 | C02           | GAGAATTTTCATCTGGACCGATTGAG                                    | Avpr1a      |
| Assays-on-Demand(TM), Gene Expression Products | Rn00821389_g1 | 168715     | 25619729 | C03           | AGTTCTTCCAGATCCAGGACGACTA                                     | Fdps        |
| Assays-on-Demand(TM), Gene Expression Products | Rn00581577_m1 | 114521     | 18377429 | D01           | GCGAAGCGCCTCATTCCAGAGCCCCG                                    | Per2        |
| Assays-on-Demand(TM), Gene Expression Products | Rn00563112_m1 | 114442     | 18540675 | D02           | TGATGCGAACATGGTGGAAGGAACG                                     | Amacr       |
| Assays-on-Demand(TM), Gene Expression Products | Rn00573120_m1 | 114453     | 18481239 | E01           | GCTGCTGACAAAAGCCAAGATTCTG                                     | Clock       |
| Assays-on-Demand(TM), Gene Expression Products | Rn00580702_m1 | 182995     | 25635686 | E02           | TTCCAGGAGAGTGCCAGGAGGTCAT                                     | Cpt1a       |
| Assays-on-Demand(TM), Gene Expression Products | Rn00591457_m1 | 114806     | 18495957 | F01           | AACGGAAGGCCTGGGTTGCCAACTA                                     | Cry2        |
| Assays-on-Demand(TM), Gene Expression Products | Rn00569117_m1 | 183620     | 25781364 | F02           | GGAAGGCTGGGCTCTATGGGTTGCC                                     | Fasn        |
| Assays-on-Demand(TM), Gene Expression Products | Rn00584155_m1 | 114524     | 18987580 | G01           | GTTTACAAGCTGGTGATCTGTCTGGG                                    | Bhlhb2      |
| Assays-on-Demand(TM), Gene Expression Products | Rn00592815_m1 | 114808     | 18998419 | G02           | ACTGACTCTTGCGGTCTTCAGTATA                                     | rELO2       |
| Assays-on-Demand(TM), Gene Expression Products | Rn00591084_m1 | 114806     | 18493312 | H01           | TGAAATTGACAACACTGGGGCATCT                                     | Bhlhb3      |
| Assays-on-Demand(TM), Gene Expression Products | Rn00583454_m1 | 114523     | 18472581 | H02           | AGCACAGCTAGAGCTGCTCAGGAGG                                     | Hao3        |
| Assays-on-Demand(TM), Gene Expression Products | Rn00821260_g1 | 168715     | 25622891 | A01           | TCCCTGTCCCGAATGATCCCGAAGA                                     | Rpl18       |
| Assays-on-Demand(TM), Gene Expression Products | Rn00595671_m1 | 114811     | 18259152 | B01           | CTGGCACCTTTGAGGTGCTGATGGT                                     | Nr1d1       |

\*\*\* End Assay Information

| Assay ID      | Gene Name             | Species      | Target Exon: | NCBI Gene Re        | Medline Reference |
|---------------|-----------------------|--------------|--------------|---------------------|-------------------|
| Rn00588658_g1 | metallothionein 3     | R norvegicus | 2            | NM_053968,NM_053968 |                   |
| Rn00587206_m1 | ubiquitin specific pr | R norvegicus | 2            | NM_053774,NM        | 20396332          |
| Rn00588855_m1 | 3-hydroxybutyrate c   | R norvegicus | 4            | NM_053995,NM        | 92232670          |
| Rn00821759_g1 | Metallothionein       | R norvegicus | 2            | NM_138826,NM        | 77228640          |
| Rn00577590_m1 | aryl hydrocarbon re   | R norvegicus | 9            | NM_024362,NM        | 98252798          |
| Rn00567492_m1 | choline kinase        | R norvegicus | 2            | NM_017127,NM        | 92250578          |
| Rn00497539_m1 | D site albumin pr     | R norvegicus | 1            | NM_012543,NM        | 20424785          |
| Rn00583910_m1 | arginine vasopress    | R norvegicus | 1            | NM_053019,NM        | 21654998          |
| Rn00821389_g1 | farensyl diphospha    | R norvegicus | 6            | NM_031840,NM        | 20139432          |
| Rn00581577_m1 | period homolog 2      | R norvegicus | 1            | NM_031678,NM        | 22313519          |
| Rn00563112_m1 | alpha-methylacyl-C    | R norvegicus | 3            | NM_012816,NM        | 21961443          |
| Rn00573120_m1 | clock gene            | R norvegicus | 12           | NM_021856,NM        | 99197211          |
| Rn00580702_m1 | carnitine palmitoylt  | R norvegicus | 13           | NM_031559,NM        | 21265074          |
| Rn00591457_m1 | cryptochrome 2 (pr    | R norvegicus | 5            | NM_133405,NM        | 21662674          |
| Rn00569117_m1 | fatty acid synthase   | R norvegicus | 2            | NM_017332,NM        | 21968690          |
| Rn00584155_m1 | basic helix-loop-hel  | R norvegicus | 4            | NM_053328,NM        | 98193761          |
| Rn00592815_m1 | fatty acid elongase   | R norvegicus | 2            | NM_134383,NM_134383 |                   |
| Rn00591084_m1 | basic helix-loop-hel  | R norvegicus | 3            | NM_133303,NM        | 98193761          |
| Rn00583454_m1 | hydroxyacid oxidas    | R norvegicus | 4            | NM_032082,NM        | 93285140          |
| Rn00821260_g1 | ribosomal protein L   | R norvegicus | 2            | NM_031102,NM        | 88224560          |
| Rn00595671_m1 | nuclear receptor su   | R norvegicus | 6            | NM_145775,NM        | 89261716          |

| Assay ID      | Celera ID                                                      |
|---------------|----------------------------------------------------------------|
| Rn00588658_g1 | rCT39025                                                       |
| Rn00587206_m1 | rCT58229,rCT58231,rCT58232                                     |
| Rn00588855_m1 | rCT52868,rCT52869                                              |
| Rn00821759_g1 | rCT39154                                                       |
| Rn00577590_m1 | rCT39565,rCT39566,rCT39567,rCT39568,rCT39569,rCT39570          |
| Rn00567492_m1 | rCT47694                                                       |
| Rn00497539_m1 | rCT54392                                                       |
| Rn00583910_m1 | rCT59889                                                       |
| Rn00821389_g1 | rCT62518,rCT62519                                              |
| Rn00581577_m1 | rCT55601                                                       |
| Rn00563112_m1 | rCT23669                                                       |
| Rn00573120_m1 | rCT56963,rCT56964                                              |
| Rn00580702_m1 | rCT48590,rCT48591                                              |
| Rn00591457_m1 | rCT26510,rCT26511                                              |
| Rn00569117_m1 | rCT33631,rCT33632                                              |
| Rn00584155_m1 | rCT56541                                                       |
| Rn00592815_m1 | rCT28729,rCT28730,rCT28731                                     |
| Rn00591084_m1 | rCT30102                                                       |
| Rn00583454_m1 | rCT51841                                                       |
| Rn00821260_g1 | rCT53676,rCT53677,rCT53678,rCT53679,rCT53673,rCT53674,rCT53675 |
| Rn00595671_m1 | rCT33291,rCT33292                                              |
