# Supplementary material for: Hepatic Gene Expression Changes throughout the Day in the Fischer Rat: Implications for Toxicogenomic Experiments
Source: Oxford University Press journal article supplement (doi:10.1093/toxsci/kfi166), 2005-04-06
Supplement: kfi166_Supplementary_Data.zip [file kfi166_Supplementary_Data.zip › kfi166Summary.pdf]

## Summary for supplementary data

The summary microarray data is in two files.

The file labeled 12hrOffsetGenes contains the 972 genes or ESTs that were common to the 12 hour offset replicate studies involving individual rat liver samples. The file contains three columns headed Accession, NAME (Gene name); Log Mean Fold change (night/day).

A second file labeled PeriodicityGenes contains the 1322 genes or ESTs that were found by the Fourier Transform analyses of the eight-pooled liver samples at four time points. The file contains three columns headed Accession, Description (Gene name); Log of periodicity score.

More details on the quantitative RT-PCR probe sets from Assays on Demand® (Applied Biosystems, Foster City, CA) are in a file labeled RT PCR suppl
