# Supplementary material for: Hepatic Gene Expression Changes throughout the Day in the Fischer Rat: Implications for Toxicogenomic Experiments
Source: Oxford University Press journal article supplement (doi:10.1093/toxsci/kfi166), 2005-04-06
Supplement: kfi166_Supplementary_Data.zip [file kfi166_Supplementary_Data.zip › kfi166suppPeriodicityGenes.pdf]

| Accession           | Description                                                  | log of Periodicity Score |
|---------------------|--------------------------------------------------------------|--------------------------|
| AA957417            |                                                              | 3.247                    |
| BM385405            | Usp2; ubiquitin specific protease 2                          | 3.182                    |
| BF556648            |                                                              | 3.155                    |
| NM_012543           | Dbp; D site albumin promoter binding protein                 | 3.099                    |
| NM_053962           | Sds; serine dehydratase                                      | 3.083                    |
| BE097398            |                                                              | 3.080                    |
| AI171992            |                                                              | 3.058                    |
| BF551869            | LOC310376; similar to hypothetical protein MGC42105          | 2.953                    |
| BU760148            |                                                              | 2.893                    |
| NM_133308           | Grin3b; glutamate receptor, ionotropic, NMDA3B               | 2.885                    |
| NM_017206           | Slc6a6; solute carrier family 6, member 6                    | 2.855                    |
| BF546094            | LOC292155; similar to heparan sulfate 2-sulfotransferase     | 2.773                    |
| NM_138826           | Mt1a; Metallothionein                                        | 2.760                    |
| BF284190            |                                                              | 2.746                    |
| BG668035            | LOC307135; similar to ribosomal protein L34; 60S ribosomal   | 2.634                    |
| AI555283            |                                                              | 2.626                    |
| NM_134383           | rELO2; fatty acid elongase 2                                 | 2.601                    |
| NM_031576           | Por; P450 (cytochrome) oxidoreductase                        | 2.600                    |
| NM_139088           | Pg10.2; PG10.2 protein                                       | 2.585                    |
| NM_052798           | Znf354a; zinc finger protein 354A                            | 2.555                    |
| NM_031678           | Per2; period homolog 2                                       | 2.505                    |
| AI599292            |                                                              | 2.489                    |
| AJ238278.1          |                                                              | 2.480                    |
| CB547623            |                                                              | 2.478                    |
| NM_031138           | LOC81816; ubiquitin conjugating enzyme                       | 2.453                    |
| BI284261            | LOC310395; similar to carbon catabolite repression 4 protein | 2.441                    |
| CB544796            | LOC307483; similar to p140mDia                               | 2.433                    |
| CB546197            | LOC305816; similar to RIKEN cDNA 4921528E07                  | 2.429                    |
| AA859114            |                                                              | 2.427                    |
| NM_017155           | Adora1; adenosine A1 receptor                                | 2.418                    |
| NM_139334           | Besh3; brain-enriched SH3-domain protein Besh3               | 2.414                    |
| CB546053            | LOC361252; similar to BBP-like protein 1 isoform b; engulfn  | 2.411                    |
| NM_022531           | Des; desmin                                                  | 2.404                    |
| BM390834            |                                                              | 2.401                    |
| CA513084            |                                                              | 2.389                    |
| BF404316            |                                                              | 2.383                    |
| AW528825            |                                                              | 2.376                    |
| 222430_Rn           |                                                              | 2.346                    |
| AI230385            |                                                              | 2.335                    |
| CB546339            |                                                              | 2.330                    |
| AA925185            |                                                              | 2.330                    |
| CB544576            | LOC306103; similar to mitotic control protein dis3 homolog   | 2.330                    |
| AI235600            |                                                              | 2.328                    |
| AA866303            |                                                              | 2.324                    |
| NM_017332           | Fasn; fatty acid synthase                                    | 2.323                    |
| AM:ARGI1-025935-CYA |                                                              | 2.319                    |
| NM_022279           | Mre11a; meiotic recombination 11 homolog A (S. cerevisiae)   | 2.316                    |
| AI578083            | LOC316432; lca69-related protein                             | 2.312                    |
| NM_012684           | Vcsa1; variable coding sequence A1                           | 2.312                    |
| BF389308            |                                                              | 2.305                    |
| AI180253            | LOC306366; similar to putative protein family member (XC17   | 2.300                    |

|                     |                                                                           |       |
|---------------------|---------------------------------------------------------------------------|-------|
| BF550197            |                                                                           | 2.292 |
| CB547260            | LOC313927; similar to DNA methyltransferase 3A                            | 2.284 |
| CB545330            | LOC360613; similar to RIKEN cDNA 1300013D05                               | 2.278 |
| BF399537            |                                                                           | 2.260 |
| AI103101            | LOC292787; similar to RIKEN cDNA 1810054G18                               | 2.259 |
| NM_012761           | Sp4; Sp4 transcription factor                                             | 2.255 |
| CB545447            |                                                                           | 2.250 |
| CA508347            |                                                                           | 2.249 |
| BF548780            |                                                                           | 2.248 |
| AW920372            | LOC294911; similar to hypothetical protein MGC27085                       | 2.245 |
| CB546755            |                                                                           | 2.239 |
| CB547306            | Pxk; PX serine/threonine kinase                                           | 2.238 |
| CB545260            |                                                                           | 2.237 |
| BF395335            |                                                                           | 2.230 |
| NM_017142           | Adcy8; adenylyl cyclase 8                                                 | 2.216 |
| AI071067            | LOC361615; similar to Tumor necrosis factor receptor superfamily member 1 | 2.215 |
| NM_017223           | Slc20a2; solute carrier family 20, member 2                               | 2.210 |
| CB545990            |                                                                           | 2.201 |
| CB605692            | LOC312574; similar to membrane glycoprotein                               | 2.200 |
| NM_012639           | Raf1; murine leukemia viral (v-raf-1) oncogene homolog 1 (3 isoforms)     | 2.197 |
| NM_012655           | Sp1; Sp1 transcription factor                                             | 2.194 |
| NM_031044           | Hnmt; histamine N-methyltransferase                                       | 2.185 |
| BF564897            | LOC360858; similar to LIM-homeobox protein                                | 2.176 |
| BF405177            | LOC361461; similar to tumor protein D53                                   | 2.172 |
| AM:ARGI1-036695-CYA |                                                                           | 2.157 |
| BQ209637            | LOC303915; similar to RIKEN cDNA 6820449I09 gene                          | 2.154 |
| BI286772            | LOC299204; similar to NimA-related protein kinase                         | 2.153 |
| AW534222            |                                                                           | 2.143 |
| BF567711            | LOC295619; similar to KIAA1189 protein                                    | 2.132 |
| CB544702            |                                                                           | 2.129 |
| AA943040            | LOC365372; similar to DKFZP434P1750 protein                               | 2.126 |
| CB546181            | LOC300880; similar to KIAA1009 protein                                    | 2.124 |
| NM_172067           | Sponf; f-spondin                                                          | 2.118 |
| BF549473            |                                                                           | 2.116 |
| CB547780            |                                                                           | 2.105 |
| AA943768            | LOC311857; similar to G protein-coupled receptor 108                      | 2.105 |
| BF390790            |                                                                           | 2.105 |
| BE106199            | LOC300807; similar to nuclear orphan receptor/transcription factor        | 2.094 |
| BE114108            |                                                                           | 2.092 |
| NM_030858           | Madh7; MAD homolog 7 (Drosophila)                                         | 2.090 |
| AI170446            |                                                                           | 2.088 |
| NM_031977           | Src; tyrosine protein kinase pp60-c-src                                   | 2.087 |
| CB547642            | LOC315634; similar to RIKEN cDNA 1500011D06                               | 2.084 |
| BF567841            |                                                                           | 2.082 |
| CB548366            | LOC312338; similar to Homeobox protein Hox-A10 (Hox-1H)                   | 2.082 |
| CB547150            | LOC309264; similar to zinc finger protein 185 (LIM domain)                | 2.079 |
| NM_145184           | Usp15; ubiquitin specific protease 15                                     | 2.066 |
| CB548089            | LOC290447; similar to highwire; PAM; rpm 1                                | 2.065 |
| NM_031341           | Slc7a7; solute carrier family 7 (cationic amino acid transporter)         | 2.065 |
| AA925571            |                                                                           | 2.056 |
| BQ210017            |                                                                           | 2.056 |
| BG664607            | LOC290923; similar to N(4)-(beta-N-acetylglucosaminy)-L-asparagine        | 2.053 |

|            |                                                                |       |
|------------|----------------------------------------------------------------|-------|
| NM_057211  | Klf9; Kruppel-like factor 9                                    | 2.049 |
| AF050660.1 |                                                                | 2.041 |
| NM_031588  | Nrg1; neuregulin 1                                             | 2.035 |
| CB546095   | LOC306542; similar to RNA polymerase III transcription initi   | 2.029 |
| BQ210834   | LOC303617; similar to fetal Alzheimer antigen isoform 2; bro   | 2.026 |
| AW920799   | LOC295461; similar to Protein transport protein Sec24B (SEC    | 2.023 |
| AW535168   | LOC305999; similar to Nkx-3.1                                  | 2.020 |
| BF548818   |                                                                | 2.016 |
| BF557624   |                                                                | 2.015 |
| BE097835   |                                                                | 2.014 |
| M59814.1   |                                                                | 2.014 |
| BF389451   | LOC312480; similar to Nspc1 protein                            | 2.011 |
| CB547935   | LOC303553; similar to RhoN                                     | 2.010 |
| NM_017128  | Inhba; inhibin beta-A                                          | 2.008 |
| AA900690   |                                                                | 2.007 |
| BQ782565   |                                                                | 2.006 |
| CB548368   |                                                                | 2.003 |
| BG378180   |                                                                | 2.003 |
| BF420478   | LOC361264; similar to cardiac Ca <sup>2+</sup> release channel | 2.001 |
| BE126587   | LOC362871; similar to ETS-domain protein ELK-3 (ETS-relat      | 1.997 |
| BF543486   |                                                                | 1.996 |
| BF564669   |                                                                | 1.993 |
| BE095833   | LOC360983; similar to RIKEN cDNA 1110067D22                    | 1.992 |
| CB546360   |                                                                | 1.990 |
| NM_031095  | Renbp; renin-binding protein                                   | 1.990 |
| BQ203637   | LOC300786; similar to ClpX protein                             | 1.988 |
| NM_022623  | Fzd4; frizzled homolog 4 (Drosophila)                          | 1.988 |
| CB545360   | LOC360477; similar to RIKEN cDNA 3930401K13                    | 1.984 |
| CB545167   | LOC311631; similar to RIKEN cDNA 2410003H12                    | 1.976 |
| BI276840   | LOC363537; similar to TBX1 protein                             | 1.975 |
| AI111480   | Grik1; glutamate receptor, ionotropic, kainate 1               | 1.973 |
| BI289222   |                                                                | 1.971 |
| BF547054   |                                                                | 1.970 |
| NM_022937  |                                                                | 1.967 |
| CB606356   | ABCA7; ATP-binding cassette, sub-family A, member 7            | 1.965 |
| CA511855   | LOC313867; similar to leucine rich protein mLRP130             | 1.965 |
| AI145026   | Serpina1; serine (or cysteine) proteinase inhibitor, clade A   | 1.963 |
| AW252132   |                                                                | 1.958 |
| CB544871   |                                                                | 1.952 |
| AI136707   |                                                                | 1.949 |
| BQ203235   |                                                                | 1.948 |
| NM_012586  | Iapp; islet amyloid polypeptide                                | 1.947 |
| NM_017031  | Pde4b; phosphodiesterase 4B                                    | 1.942 |
| BF393342   |                                                                | 1.940 |
| CA504421   |                                                                | 1.938 |
| CB546695   | LOC302327; similar to transcription factor znf6 - human        | 1.934 |
| BF288056   | LOC297411; similar to CGI-121 protein                          | 1.932 |
| NM_020097  | Extl3; exostoses (multiple)-like 3                             | 1.930 |
| CB547444   | LOC360748; similar to DNA-dependent protein kinase catalyt     | 1.927 |
| CB544908   | Sast; syntrophin associated serine/threonine kinase            | 1.923 |
| AI237597   |                                                                | 1.923 |
| BG376923   |                                                                | 1.921 |

|                     |                                                              |       |
|---------------------|--------------------------------------------------------------|-------|
| NM_012894           | Adarb1; adenosine deaminase, RNA-specific, B1                | 1.920 |
| CB606005            | LOC308393; similar to KIAA1183 protein                       | 1.915 |
| AM:ARG11-023000-CYA |                                                              | 1.910 |
| AI045144            | C6; complement component 6                                   | 1.909 |
| BQ191626            |                                                              | 1.909 |
| BF397094            |                                                              | 1.904 |
| NM_022637           | Vax2; ventral anterior homeobox 2                            | 1.898 |
| BQ209232            | LOC288444; similar to heat shock protein 105 kDa alpha       | 1.898 |
| BF420176            |                                                              | 1.893 |
| BE106849            |                                                              | 1.890 |
| BQ203909            | LOC315434; similar to hypothetical protein FLJ20189          | 1.888 |
| BF283409            | Cldn1; claudin 1                                             | 1.886 |
| NM_030832           | Fabp7; fatty acid binding protein 7                          | 1.885 |
| NM_031987           | Crot; carnitine O-octanoyltransferase                        | 1.884 |
| AA997325            | LOC360891; similar to mena protein                           | 1.883 |
| CA513011            |                                                              | 1.879 |
| CB606176            | LOC361581; similar to neuron navigator 2 isoform L; retinoic | 1.877 |
| CB544578            | LOC306871; similar to Desmoplakin (DP) (250/210 kDa para     | 1.876 |
| BI297410            |                                                              | 1.875 |
| AW917363            | LOC304284; similar to I3 protein                             | 1.875 |
| NM_031699           | Cldn1; claudin 1                                             | 1.872 |
| NM_031147           | Cirbp; cold inducible RNA-binding protein                    | 1.869 |
| AA817695            | LOC361266; similar to protein RAKb                           | 1.868 |
| AF053096.1          |                                                              | 1.865 |
| BM385851            | Per1; period 1                                               | 1.865 |
| NM_053771           | Lim2; lens intrinsic membrane protein 2 (19 kDa)             | 1.865 |
| CB544963            | LOC315297; similar to KIAA1602 protein                       | 1.864 |
| NM_024489           | Rinzf; zinc finger protein RIN ZF                            | 1.862 |
| AA851185            |                                                              | 1.858 |
| CB545168            |                                                              | 1.857 |
| CB545625            | LOC307001; similar to Gli3 protein                           | 1.856 |
| CB545614            | LOC361980; similar to RIKEN cDNA 2810403A07                  | 1.855 |
| AM:ARG11-031402-CYA |                                                              | 1.854 |
| CB547325            | LOC365590; similar to BMP-induced factor 1                   | 1.852 |
| CB547301            |                                                              | 1.847 |
| NM_012665           | Syt2; synaptotagmin 2                                        | 1.847 |
| CB544263            |                                                              | 1.843 |
| BF523891            | Pbef; pre-B-cell colony-enhancing factor                     | 1.842 |
| BF401557            | Mafb; v-maf musculoaponeurotic fibrosarcoma oncogene fan     | 1.841 |
| BM388699            |                                                              | 1.841 |
| CB545817            | LOC298763; similar to Mta3 protein                           | 1.841 |
| CB546723            | LOC316736; similar to basilin                                | 1.837 |
| AA923984            |                                                              | 1.835 |
| CB544950            | LOC287462; similar to Calmodulin binding transcription activ | 1.833 |
| CB585645            | LOC304695; similar to Tumor necrosis factor receptor superf  | 1.829 |
| CB544748            | LOC317417; similar to hypothetical protein FLJ10613          | 1.823 |
| NM_053487           | Pex11a; peroxisomal membrane protein Pmp26p (Peroxin-11      | 1.823 |
| BG375318            |                                                              | 1.823 |
| CB545570            | LOC304761; similar to SWI/SNF-related matrix-associated a    | 1.817 |
| BF290190            |                                                              | 1.814 |
| CB544323            | LOC296090; similar to Spectrin beta chain, brain 4 (Spectrin | 1.814 |
| BE102666            | LOC308632; similar to SOUL protein                           | 1.812 |

|                     |                                                              |       |
|---------------------|--------------------------------------------------------------|-------|
| AM:ARGI1-036581-CYA |                                                              | 1.809 |
| BQ198908            | LOC361820; similar to Periodic tryptophan protein 2 homolog  | 1.808 |
| AI071674            |                                                              | 1.806 |
| CB544913            | LOC308508; similar to ARX                                    | 1.804 |
| CB544318            |                                                              | 1.801 |
| AW433872            | LOC361116; similar to RIKEN cDNA 3110001I22                  | 1.800 |
| BF407610            | Hspa1a; heat shock 70kD protein 1A                           | 1.799 |
| NM_017127           | Chk; choline kinase                                          | 1.799 |
| NM_017354           | RNU16845; neurotrimin                                        | 1.797 |
| NM_053807           | Grasp1; GRIP-associated protein 1                            | 1.795 |
| AF268593.1          |                                                              | 1.793 |
| NM_031741           |                                                              | 1.790 |
| AA955786            |                                                              | 1.790 |
| NM_031317           | Pdgfc; platelet-derived growth factor, C polypeptide         | 1.787 |
| NM_133610           | Kcnh5; potassium voltage-gated channel, subfamily H (eag-r   | 1.786 |
| BM385216            |                                                              | 1.782 |
| AW529619            |                                                              | 1.779 |
| AA955060            |                                                              | 1.774 |
| BM387978            |                                                              | 1.772 |
| BE113280            | LOC362398; similar to plexin 1                               | 1.772 |
| AA998741            |                                                              | 1.772 |
| CB544435            | LOC363062; similar to LOC330938 protein                      | 1.770 |
| CB545502            | LOC313525; similar to hypothetical protein FLJ21156          | 1.767 |
| AI412612            |                                                              | 1.763 |
| AI102097            | LOC313977; similar to Kiaa0575                               | 1.762 |
| BF401577            |                                                              | 1.762 |
| NM_019305           | Fgf2; fibroblast growth factor 2                             | 1.761 |
| CB546666            | LOC363781; similar to hypothetical protein FLJ31579          | 1.755 |
| BM388073            | Zdhhc2; zinc finger, DHHC domain containing 2                | 1.755 |
| AI229056            |                                                              | 1.753 |
| BE112905            | LOC365361; similar to RIKEN cDNA 4930404J24                  | 1.753 |
| BF567421            | LOC299123; similar to Hypothetical protein KIAA0586          | 1.752 |
| BF419904            | LOC291005; similar to GROWTH ARREST AND DNA-DAM              | 1.748 |
| CB545014            | LOC298941; similar to laminin B1                             | 1.747 |
| BM392175            |                                                              | 1.746 |
| CB544726            | LOC363136; similar to PL6 protein                            | 1.743 |
| 253076_Rn           |                                                              | 1.740 |
| NM_030840           | Pres; prestin (motor protein)                                | 1.740 |
| NM_053523           | Herpud1; homocysteine-inducible, endoplasmic reticulum str   | 1.740 |
| AI385136            | LOC302526; similar to RIKEN cDNA 5730403E06                  | 1.739 |
| BI294871            |                                                              | 1.737 |
| BF418053            |                                                              | 1.732 |
| CB546474            | LOC303970; similar to HMG-box transcription factor BBX       | 1.730 |
| BI290768            | rELO2; fatty acid elongase 2                                 | 1.727 |
| BF386196            |                                                              | 1.727 |
| CB606346            | LOC314329; similar to polyglutamine-containing protein       | 1.727 |
| BF553484            |                                                              | 1.725 |
| AW918727            | LOC288771; similar to RNA binding motif, single stranded int | 1.725 |
| AA924078            |                                                              | 1.722 |
| NM_133597           | Chrn3; cholinergic receptor, nicotinic, beta polypeptide 3   | 1.718 |
| BI395825            |                                                              | 1.716 |
| CB544418            | LOC290566; similar to KIAA1290 protein                       | 1.716 |

|           |                                                              |       |
|-----------|--------------------------------------------------------------|-------|
| CB548046  | LOC308716; similar to hypothetical protein E230031K19        | 1.711 |
| CB606331  | LOC292090; similar to UDP-N-acetyl-alpha-D-galactosamine     | 1.710 |
| CB546857  | LOC362170; similar to apoptosis inhibitor 5; fibroblast grow | 1.710 |
| NM_017020 | Il6r; interleukin 6 receptor                                 | 1.709 |
| BQ196242  |                                                              | 1.708 |
| BF285037  |                                                              | 1.708 |
| BQ194440  | LOC292168; similar to mucolipin-2                            | 1.707 |
| NM_053536 | Klf15; Kruppel-like factor 15                                | 1.707 |
| BF402863  | LOC307853; similar to fatty acid hydroxylase (36.3 kD) (1K75 | 1.705 |
| BM386244  |                                                              | 1.705 |
| AA849748  | LOC294846; similar to Ac1133                                 | 1.704 |
| NM_057133 | Nr0b2; nuclear receptor subfamily 0, group B, member 2       | 1.701 |
| BE119103  |                                                              | 1.700 |
| BF401264  | Grik2; glutamate receptor, ionotropic, kainate 2             | 1.700 |
| 11094396  |                                                              | 1.698 |
| AA818893  |                                                              | 1.697 |
| BF567393  | LOC311051; similar to hypothetical protein                   | 1.690 |
| CB606301  | LOC287537; similar to active breakpoint cluster region-relat | 1.690 |
| BF286666  |                                                              | 1.690 |
| CB544830  | LOC315761; similar to cartilage intermediate layer protein,  | 1.689 |
| AW523650  |                                                              | 1.689 |
| AA819014  | Rps6kb1; S6 kinase                                           | 1.688 |
| CB545044  |                                                              | 1.687 |
| NM_138519 | Dkk3; dickkopf homolog 3 (Xenopus laevis)                    | 1.686 |
| BE099763  | LOC361810; similar to FKBP51                                 | 1.676 |
| BE100378  |                                                              | 1.673 |
| NM_022600 | Adcy5; adenylate cyclase 5                                   | 1.672 |
| AI112095  | LOC303468; similar to alpha-sarcoglycan                      | 1.670 |
| AW529678  | LOC315023; similar to mitochondrial folate transporter/carri | 1.669 |
| BF568014  | LOC315421; similar to mastermind homolog                     | 1.669 |
| AW253868  |                                                              | 1.666 |
| CB548151  | LOC360956; similar to RIKEN cDNA 2810413P16                  | 1.665 |
| BF284120  | Efna1; ephrin A1                                             | 1.664 |
| NM_024351 | Hspa8; heat shock protein 8                                  | 1.662 |
| AA818004  |                                                              | 1.661 |
| AA801331  |                                                              | 1.655 |
| AI136514  |                                                              | 1.652 |
| CB546677  |                                                              | 1.648 |
| BQ195908  |                                                              | 1.645 |
| NM_022933 | Loc65027; beta-catenin binding protein                       | 1.645 |
| CB545980  | LOC363035; similar to RIKEN cDNA 6030404E16                  | 1.644 |
| NM_016990 | Add1; adducin 1, alpha                                       | 1.641 |
| AA818054  |                                                              | 1.640 |
| CB545732  | LOC312562; similar to RIKEN cDNA 5330426D11                  | 1.637 |
| NM_134408 | Cir12; calcium-independent alpha-latrotoxin receptor homolog | 1.636 |
| AA923937  | LOC360985; similar to expressed sequence AI503894            | 1.635 |
| NM_012571 | Got1; glutamate oxaloacetate transaminase 1                  | 1.634 |
| CA507867  |                                                              | 1.634 |
| NM_017069 | Gabra3; gamma-aminobutyric acid receptor, subunit alpha 3    | 1.631 |
| CB546349  |                                                              | 1.628 |
| CB606283  | Pkcm; protein kinase C, mu                                   | 1.627 |
| BF399043  |                                                              | 1.622 |

|                     |                                                              |       |
|---------------------|--------------------------------------------------------------|-------|
| CB546565            | LOC306734; similar to RIKEN cDNA 4932432N11 gene             | 1.621 |
| CB545100            | LOC362713; similar to KIAA1724 protein                       | 1.619 |
| D88461.1            |                                                              | 1.619 |
| AM:ARG11-023935-CYA |                                                              | 1.615 |
| U89531.1            |                                                              | 1.614 |
| NM_053665           | Akap1; A kinase (PRKA) anchor protein 1                      | 1.613 |
| BQ194325            | LOC365266; similar to Potential phospholipid-transporting AT | 1.611 |
| AI716185            | LOC304887; Ral-A exchange factor RalGPS2                     | 1.611 |
| BF548712            |                                                              | 1.609 |
| CB606253            | LOC313641; perlecan                                          | 1.608 |
| AW522236            | LOC304498; similar to hypothetical protein MGC33630          | 1.608 |
| CB545156            | LOC291091; similar to serine (or cysteine) proteinase inhibi | 1.606 |
| CB544903            | LOC305556; similar to KIAA0903-like protein                  | 1.606 |
| NM_138504           | Okl38; pregnancy-induced growth inhibitor                    | 1.606 |
| CA510640            | LOC292095; similar to UDP-N-acetylglucosamine--peptide N     | 1.606 |
| NM_030996           | Oprs1; opioid receptor, sigma 1                              | 1.604 |
| AI045814            | Vnn1; vanin 1                                                | 1.604 |
| CB544873            | LOC362096; similar to hypothetical protein                   | 1.602 |
| BU760394            |                                                              | 1.602 |
| AA925444            |                                                              | 1.600 |
| AM:ARG11-026574-CYA |                                                              | 1.599 |
| CB544724            | Mll; myeloid/lymphoid or mixed-lineage leukemia              | 1.599 |
| BF544382            |                                                              | 1.597 |
| BF554565            | LOC292127; similar to SNM1 protein                           | 1.595 |
| BE101884            | LOC289786; similar to KIAA0363                               | 1.588 |
| BF564378            |                                                              | 1.584 |
| NM_013008           | Pou1f1; POU domain, class 1, transcription factor 1          | 1.583 |
| C06768              | LOC289085; similar to Putative alpha-mannosidase C1orf22     | 1.583 |
| AI231289            | Mfng; manic fringe homolog (Drosophila)                      | 1.582 |
| BF567290            | LOC288655; similar to M-RdgB2 retinal degeneration protein   | 1.581 |
| NM_012534           | Cryaa; crystallin, alpha A                                   | 1.576 |
| BG664838            | LOC310486; similar to Retinoic acid receptor responder prote | 1.575 |
| AM:ARG11-036095-CYA |                                                              | 1.573 |
| CB545707            | LOC313138; similar to ORC3-related protein                   | 1.571 |
| BF548067            |                                                              | 1.570 |
| BE108115            |                                                              | 1.568 |
| NM_031089           | Pthr2; parathyroid hormone receptor 2                        | 1.567 |
| AA891693            | LOC314214; similar to RIKEN cDNA 2810055F11                  | 1.564 |
| AW522228            | MGC72630; similar to RIKEN cDNA 5830404H04                   | 1.564 |
| NM_133393           | Lfng; lunatic fringe gene homolog (Drosophila)               | 1.563 |
| AI072079            |                                                              | 1.562 |
| AI501466            | LOC292263; similar to Fbxo5 protein                          | 1.562 |
| BQ207708            |                                                              | 1.562 |
| CB547157            | LOC362812; similar to RIKEN cDNA 1810013D05                  | 1.561 |
| AA899909            |                                                              | 1.561 |
| BF524125            | LOC78973; Axin-associating molecule                          | 1.559 |
| NM_053687           | Slfn4; schlafen 4                                            | 1.558 |
| BF546096            | LOC302863; similar to RIKEN cDNA 6430520C02                  | 1.553 |
| CB547830            |                                                              | 1.552 |
| CB548474            | LOC304265; similar to Flt3 protein                           | 1.550 |
| CB544938            | LOC317612; similar to RIKEN cDNA 2600017A12                  | 1.549 |
| AY090783.1          |                                                              | 1.549 |

|            |                                                              |       |
|------------|--------------------------------------------------------------|-------|
| AW521237   | LOC365611; similar to grey lethal osteopetrosis; grey-lethal | 1.548 |
| BM390716   |                                                              | 1.546 |
| BF524846   |                                                              | 1.546 |
| BE107866   | LOC305719; similar to fez-like                               | 1.545 |
| CB545152   |                                                              | 1.545 |
| AI059216   | LOC365352; similar to flavoprotein oxidoreductase MICAL2     | 1.544 |
| NM_030854  | Lect1; leukocyte cell derived chemotaxin 1                   | 1.542 |
| NM_139258  | Bmf; Bcl-2 modifying factor                                  | 1.540 |
| BF398158   |                                                              | 1.539 |
| BF285569   |                                                              | 1.539 |
| NM_017364  | Znf146; zinc finger protein 260                              | 1.538 |
| BF398668   | LOC307109; similar to TAFII140 protein                       | 1.534 |
| AI007647   | LOC310448; bone specific CMF608                              | 1.533 |
| BF555776   | LOC304572; similar to autism susceptibility candidate 2; aut | 1.533 |
| NM_017310  | Sema3a; Semaphorin 3a                                        | 1.533 |
| NM_031559  | Cpt1a; carnitine palmitoyltransferase 1, liver               | 1.533 |
| AW921982   | LOC300043; similar to Plec1 protein                          | 1.532 |
| NM_017237  | Uchl1; ubiquitin carboxy-terminal hydrolase L1               | 1.532 |
| AI236332   | Sat; spermidine/spermine N1-acetyl transferase               | 1.526 |
| AI385356   |                                                              | 1.525 |
| BG372891   |                                                              | 1.522 |
| CB546773   | LOC316013; similar to huntingtin interacting protein B isofo | 1.518 |
| AA924641   | LOC301079; similar to RIKEN cDNA 1110059G10                  | 1.516 |
| NM_053902  | Kynu; kynureninase (L-kynurenine hydrolase)                  | 1.515 |
| BG665369   | LOC292640; similar to RIKEN cDNA 1110059P08                  | 1.515 |
| BI288843   |                                                              | 1.514 |
| CB546177   | LOC310982; similar to CG5987-PA                              | 1.514 |
| CB544506   | LOC362519; similar to SMC2 protein                           | 1.513 |
| BF409122   |                                                              | 1.508 |
| CB606309   | LOC308218; similar to KIAA1838 protein                       | 1.504 |
| NM_021851  | Lin7c; lin-7-C                                               | 1.502 |
| U32436.1   |                                                              | 1.500 |
| CB605923   | St6gal2; beta galactoside alpha 2,6 sialyltransferase 2      | 1.500 |
| BQ206121   | LOC360646; similar to RIKEN cDNA 0610025L06                  | 1.500 |
| BE116922   | LOC315532; similar to retrovirus integration site            | 1.499 |
| NM_144762  | Baal; brain and acute leukemia, cytoplasmic                  | 1.496 |
| BE108272   |                                                              | 1.496 |
| NM_031664  | Slc28a2; solute carrier family 28, member 2                  | 1.495 |
| CB546180   | LOC362672; similar to KIAA1185 protein                       | 1.494 |
| AI548615   |                                                              | 1.491 |
| BG371790   |                                                              | 1.489 |
| BF285490   | LOC362057; similar to semaF cytoplasmic domain associate     | 1.486 |
| BI296950   | LOC300719; similar to calcium binding protein Kip 2          | 1.485 |
| CB548053   | LOC306811; similar to protein kinase, lysine deficient 1; ki | 1.484 |
| CB547633   | LOC296121; similar to mKIAA0055 protein                      | 1.483 |
| AB045586.1 |                                                              | 1.481 |
| CB605591   | LOC314969; similar to nucleolar protein 1                    | 1.481 |
| BF549706   |                                                              | 1.481 |
| BE114208   |                                                              | 1.480 |
| CB546400   | LOC290692; similar to Khl2 protein                           | 1.478 |
| BF393976   |                                                              | 1.478 |
| AF487544.1 |                                                              | 1.473 |

|                     |                                                              |       |
|---------------------|--------------------------------------------------------------|-------|
| CB546639            | LOC293922; similar to FMR2 protein                           | 1.472 |
| NM_134462           | Spca2; putative secretory pathway Ca-ATPase SPCA2            | 1.471 |
| CB548036            | LOC291760; similar to desmocollin type 2                     | 1.466 |
| NM_053968           | Mt3; metallothionein 3                                       | 1.464 |
| AF313481.1          |                                                              | 1.459 |
| NM_022383           | Cap1; cyclase-associated protein homologue                   | 1.459 |
| CB547736            |                                                              | 1.456 |
| BF414809            |                                                              | 1.456 |
| CB546274            | LOC294031; similar to hypothetical protein                   | 1.454 |
| BM390705            | LOC301014; similar to RIKEN cDNA 6620401K05                  | 1.450 |
| BQ201936            |                                                              | 1.449 |
| AI012106            |                                                              | 1.446 |
| BF389503            | LOC315438; similar to hypothetical protein                   | 1.444 |
| BQ192285            | LOC316737; similar to Lipin 2                                | 1.442 |
| CB546838            | Slick; sodium- and chloride-activated ATP-sensitive potassiu | 1.442 |
| AM:ARGI1-030337-CYA |                                                              | 1.441 |
| AI409191            |                                                              | 1.441 |
| CB545862            | LOC304916; similar to KIAA2025 protein                       | 1.439 |
| AF466145.1          |                                                              | 1.438 |
| CB544693            |                                                              | 1.436 |
| BI296028            |                                                              | 1.436 |
|                     | 54803                                                        | 1.435 |
| NM_013149           | Ahr; aryl hydrocarbon receptor                               | 1.435 |
| BM390474            |                                                              | 1.433 |
| NM_022692           | Rab5a; small GTP-binding protein rab5                        | 1.432 |
| AI407242            | LOC293455; similar to ADP-ribosylation factor binding protei | 1.432 |
|                     | 2432014                                                      | 1.432 |
| NM_012830           | Cd2; CD2 antigen                                             | 1.430 |
| CB547266            | LOC299897; similar to atypical GATA protein TRPS1            | 1.430 |
| NM_031745           |                                                              | 1.429 |
| AA848226            |                                                              | 1.428 |
| CB544629            | LOC361954; similar to Veph-A                                 | 1.426 |
| AI145357            |                                                              | 1.425 |
| M30596.1            |                                                              | 1.425 |
| CB546795            |                                                              | 1.424 |
| CB545496            | LOC367903; similar to armadillo repeat protein ALEX2         | 1.424 |
| CB547751            | Itga5; integrin alpha 5                                      | 1.424 |
| NM_013120           | Gckr; glucokinase regulatory protein                         | 1.422 |
| AA800698            |                                                              | 1.421 |
| NM_031579           | Ptp4a1; protein tyrosine phosphatase 4a1                     | 1.421 |
| CB547750            |                                                              | 1.420 |
| CB544708            |                                                              | 1.419 |
| NM_017212           | Mapt; microtubule-associated protein tau                     | 1.415 |
| BM387554            |                                                              | 1.415 |
| AI175258            |                                                              | 1.414 |
| BQ200986            | LOC296478; similar to cDNA sequence BC021513                 | 1.412 |
| CB548272            | LOC309196; similar to hypothetical protein                   | 1.411 |
| H31252              | LOC310244; similar to RIKEN cDNA 3110050N22                  | 1.410 |
| H32677              | Psa; puromycin-sensitive aminopeptidase                      | 1.410 |
| BE098106            | LOC361637; similar to Aa2-174                                | 1.409 |
| BF524461            | LOC365751; similar to RING finger protein 29                 | 1.408 |
| BQ202476            | LOC311849; similar to carnitine acetyltransferase            | 1.407 |

|                     |                                                              |       |
|---------------------|--------------------------------------------------------------|-------|
| AM:ARGI1-037130-CYA |                                                              | 1.403 |
| CB548370            | LOC361689; similar to unc93 homolog B                        | 1.402 |
| BF549478            |                                                              | 1.401 |
| AW142773            |                                                              | 1.400 |
| CB605784            | Lama5; laminin, alpha 5                                      | 1.398 |
| BQ783106            | LOC298003; similar to Galactose-1-phosphate uridylyltransfe  | 1.396 |
| NM_022942           | Bche; butyrylcholinesterase                                  | 1.395 |
| AA957880            |                                                              | 1.394 |
| BF556670            |                                                              | 1.394 |
| CB546775            |                                                              | 1.392 |
| CB544248            | LOC312225; similar to HSPC049 protein                        | 1.391 |
| AA955816            | LOC304074; similar to HYPOTHETICAL PROTEIN KIAA0131          | 1.390 |
| NM_053019           | Avpr1a; arginine vasopressin receptor 1A                     | 1.389 |
| BQ204938            |                                                              | 1.389 |
| BQ207695            |                                                              | 1.389 |
| BF523054            |                                                              | 1.388 |
| AM:ARGI1-036789-CYA |                                                              | 1.383 |
| AI410414            | LOC287054; similar to cDNA sequence BC024814                 | 1.376 |
| CB547946            |                                                              | 1.376 |
| CB544678            | LOC294716; similar to RIKEN cDNA 4933425L06                  | 1.376 |
| AI112177            | LOC361975; similar to LBA                                    | 1.375 |
| CB546069            | Atcay; caytaxin                                              | 1.374 |
| CB547920            | LOC363060; similar to RIKEN cDNA 1600029D21                  | 1.372 |
| CB605855            | Slu7; step II splicing factor SLU7 (S. cerevisiae)           | 1.372 |
| NM_013160           | Mxi1; Max interacting protein 1                              | 1.371 |
| AA817956            |                                                              | 1.370 |
| AI172546            | LOC360592; similar to mKIAA0898 protein                      | 1.370 |
| BF415205            | Actc1; actin alpha cardiac 1                                 | 1.369 |
| CB545768            |                                                              | 1.368 |
| CB545763            |                                                              | 1.366 |
| AW915155            | LOC367179; similar to LNV                                    | 1.366 |
| BM383154            |                                                              | 1.366 |
| CB547124            | LOC360748; similar to DNA-dependent protein kinase catalyt   | 1.362 |
| CB546067            | LOC298511; similar to microtubule-actin crosslinking factor  | 1.361 |
| CA508349            | LOC316575; similar to thyroid hormone receptor interactor 12 | 1.357 |
| NM_145677           | Pcscl; peroxisomal Ca-dependent solute carrier-like protein  | 1.355 |
| AA818238            |                                                              | 1.354 |
| CB546661            | LOC362684; similar to KIAA1414 protein                       | 1.352 |
| AI145264            |                                                              | 1.352 |
| AM:ARGI1-033393-CYA |                                                              | 1.351 |
| CB546593            | LOC304740; similar to CLIP-associating protein 1; Drosophila | 1.350 |
| AI072379            |                                                              | 1.350 |
| BF563406            |                                                              | 1.350 |
| AF102149.1          |                                                              | 1.349 |
| AI029057            | Phyh; phytanoyl-CoA hydroxylase (Refsum disease)             | 1.348 |
| AA955548            |                                                              | 1.348 |
| CB546140            | LOC306792; similar to lysophospholipid receptor B3           | 1.345 |
| BQ204060            |                                                              | 1.344 |
| BE096055            |                                                              | 1.344 |
| AA964690            |                                                              | 1.342 |
| CB545552            | LOC289664; similar to LIM domain binding 2; LIM binding do   | 1.342 |
| NM_144755           | LOC246273; kinase                                            | 1.337 |

|                     |                                                              |       |
|---------------------|--------------------------------------------------------------|-------|
| NM_053879           | Cntn4; contactin 4                                           | 1.336 |
| CB546337            | LOC314713; similar to down-regulated in metastasis           | 1.334 |
| BF405996            | Cacna2d3; calcium channel, voltage dependent, alpha2/delta   | 1.333 |
| BF548575            | LOC362367; similar to LOC223082                              | 1.328 |
| BI290819            | LOC300446; similar to RIKEN cDNA E430039K05 gene             | 1.323 |
| CB546296            |                                                              | 1.323 |
| AI058971            | LOC305842; RNase 6                                           | 1.322 |
| NM_017149           | Meox2; mesenchyme homeo box 2                                | 1.321 |
| CB545108            |                                                              | 1.320 |
| AW530944            | LOC303496; similar to T-cell-specific T-box transcription fa | 1.320 |
| BE119386            |                                                              | 1.319 |
| NM_017090           | Gucy1a3; guanylate cyclase 1, soluble, alpha 3               | 1.319 |
| CB548278            | LOC310838; similar to p130Cas-binding protein AND34-1        | 1.315 |
| BQ211069            | LOC308321; similar to mKIAA0287 protein                      | 1.315 |
| BI277629            | Usp2; ubiquitin specific protease 2                          | 1.313 |
| BF551808            | LOC306920; similar to RIKEN cDNA 1190005B03                  | 1.313 |
| AI409324            | LOC315326; similar to Tenc1 protein                          | 1.311 |
| BF566216            |                                                              | 1.310 |
| BF397986            | LOC317252; similar to SNF2/RAD54 family protein              | 1.309 |
| CB545457            | LOC362587; similar to macrophin 1 isoform 4                  | 1.309 |
| CB545583            |                                                              | 1.305 |
| AI171249            | Pik3r1; phosphatidylinositol 3-kinase, regulatory subunit, p | 1.304 |
| NM_017315           | Slc23a1; solute carrier family 23 (nucleobase transporters), | 1.304 |
| CB544679            |                                                              | 1.303 |
| CB546553            | Abca1; ATP-binding cassette, sub-family A (ABC1), member     | 1.303 |
| AB072252.1          |                                                              | 1.301 |
| BG378278            |                                                              | 1.298 |
| BQ209518            | LOC317344; similar to hypothetical protein MGC39350          | 1.297 |
| CB545026            | ADRP; adipose differentiation-related protein                | 1.297 |
| AW143689            | LOC363118; similar to RIKEN cDNA 4933408N02                  | 1.296 |
| BU671679            |                                                              | 1.295 |
| BF400835            | LOC315670; similar to hypothetical protein DKFZp547C176      | 1.295 |
| AI172479            | LOC304488; similar to T-cell activation protein phosphatase  | 1.294 |
| BF281785            |                                                              | 1.294 |
| AA899611            |                                                              | 1.293 |
| CB547790            |                                                              | 1.292 |
| CB544670            |                                                              | 1.291 |
| AI235446            |                                                              | 1.290 |
|                     | 21702659                                                     | 1.290 |
| AW526756            | Csp; cysteine string protein                                 | 1.289 |
| X95722.1            |                                                              | 1.287 |
| NM_031817           | Omd; osteomodulin (osteoaderin)                              | 1.286 |
| NM_013186           | Kcnb1; potassium voltage gated channel, Shab-related subfa   | 1.286 |
| BM382871            | LOC303923; similar to beta-1,4-galactosyltransferase 4       | 1.286 |
| AW143731            |                                                              | 1.285 |
| AA900787            |                                                              | 1.284 |
| CB546630            | LOC362873; similar to receptor for viral-encoded semaphorin  | 1.283 |
| AM:ARGI1-032371-CYA |                                                              | 1.281 |
| BF557660            | LOC360712; similar to microrchidia                           | 1.280 |
| AA818938            |                                                              | 1.278 |
| AA859056            |                                                              | 1.278 |
| CB545602            |                                                              | 1.275 |

|                     |                                                              |       |
|---------------------|--------------------------------------------------------------|-------|
| AA957185            |                                                              | 1.275 |
| AW915538            | LOC360987; LOC360987                                         | 1.274 |
| NM_134375           | LOC171390; angiotensin/vasopressin receptor                  | 1.272 |
| BM383925            | rELO1; fatty acid elongase 1                                 | 1.270 |
| BF283609            |                                                              | 1.270 |
| NM_053585           | Madd; MAP-kinase activating death domain                     | 1.268 |
| CB545206            |                                                              | 1.267 |
| CA339503            | LOC363091; similar to hypothetical protein FLJ30973          | 1.267 |
| CB546828            |                                                              | 1.266 |
| CB605722            | LOC361324; similar to semaphorin 6A1; semaphorin 6A-1        | 1.263 |
| AW141874            | LOC290577; similar to wings apart-like CG3707-PA             | 1.261 |
| AM:ARG11-028730-CYA |                                                              | 1.259 |
| CB544962            |                                                              | 1.259 |
| AF375463.1          |                                                              | 1.258 |
| AA957639            |                                                              | 1.256 |
| BF281790            |                                                              | 1.255 |
| BI274533            | LOC363016; similar to RIKEN cDNA 4931406C07                  | 1.253 |
| AA956024            |                                                              | 1.253 |
| NM_031241           | Cyp8b1; cytochrome P450, 8b1, sterol 12 alpha-hydrolase      | 1.252 |
| CB605656            | Cdv1; carnitine deficiency-associated gene expressed in vent | 1.251 |
| AI070365            |                                                              | 1.251 |
| NM_019286           | Adh1; alcohol dehydrogenase 1                                | 1.251 |
| AF249673.1          |                                                              | 1.248 |
| CB545634            | LOC311349; similar to tau tubulin kinase 2; tau-tubulin kina | 1.248 |
| CB545592            | LOC361810; similar to FKBP51                                 | 1.247 |
| BF410803            |                                                              | 1.247 |
| BQ211075            | LOC308017; similar to DNA segment, Chr 3, ERATO Doi 25C      | 1.246 |
| CB606405            |                                                              | 1.246 |
| BE120587            |                                                              | 1.246 |
| CB544824            | LOC313278; similar to protein tyrosine phosphatase, recepto  | 1.245 |
| BF551243            | LOC296322; similar to mKIAA1219 protein                      | 1.243 |
| AA923852            |                                                              | 1.242 |
| AA900319            |                                                              | 1.241 |
| BE097295            | LOC360743; similar to Pcqap protein                          | 1.239 |
| CB548008            |                                                              | 1.238 |
| BG375381            |                                                              | 1.237 |
| AI763901            |                                                              | 1.236 |
|                     | 1514944                                                      | 1.234 |
| BE115520            |                                                              | 1.231 |
| CA506718            | Rptpk; receptor-like protein tyrosine phosphatase kappa extr | 1.230 |
| CB606456            |                                                              | 1.229 |
| CB606379            | LOC306811; similar to protein kinase, lysine deficient 1; ki | 1.228 |
| BE105480            |                                                              | 1.226 |
| S67316.1            |                                                              | 1.225 |
| NM_053337           | Miz1; Msx-interacting-zinc finger                            | 1.224 |
| BF544951            |                                                              | 1.223 |
| AA901174            |                                                              | 1.221 |
| BF566962            |                                                              | 1.218 |
| X58830.1            |                                                              | 1.215 |
| CB544806            | MGC72605; RAC/CDC42 exchange factor                          | 1.214 |
| NM_031345           | Gilz; glucocorticoid-induced leucine zipper                  | 1.214 |
| CB545744            |                                                              | 1.214 |

|                     |                                                              |       |
|---------------------|--------------------------------------------------------------|-------|
| NM_080777           | Sncl; synuclein, beta                                        | 1.213 |
| AW141633            | LOC301252; similar to heat shock protein 84 - mouse          | 1.212 |
| BF545686            | Centg1; centaurin, gamma 1                                   | 1.210 |
| AA819288            | LOC310486; similar to Retinoic acid receptor responder prote | 1.210 |
| AM:ARG11-037059-CYA |                                                              | 1.206 |
| NM_017274           | Gpam; glycerol-3-phosphate acyltransferase, mitochondrial    | 1.204 |
| BF413895            |                                                              | 1.203 |
| NM_016987           | Acly; ATP citrate lyase                                      | 1.202 |
| CB547299            | LOC361894; LOC361894                                         | 1.201 |
| BF554836            | LOC304005; similar to molecule possessing ankyrin-repeats    | 1.199 |
| BF390309            | LOC360893; similar to TAFI48 protein                         | 1.199 |
| NM_022635           | Cml4; putative N-acetyltransferase Camello 4                 | 1.199 |
| CB545754            | LOC310808; similar to RIKEN cDNA 2310050P13                  | 1.198 |
| BF408621            | LOC290803; similar to testis protein TEX15                   | 1.198 |
| CB606361            | LOC316460; similar to CG18437-PA                             | 1.196 |
| AA875256            |                                                              | 1.196 |
| CB545651            | LOC301128; similar to RIKEN cDNA 4732474L06                  | 1.195 |
| AI060195            |                                                              | 1.195 |
| BQ203009            | LOC293864; similar to Ubiquitin-like protein GDX (Ubiquitin- | 1.194 |
| CB545585            | LOC361815; similar to ring finger protein 8                  | 1.193 |
| AI010919            |                                                              | 1.192 |
| NM_020106           |                                                              | 1.192 |
| AI112941            |                                                              | 1.191 |
| CB544957            | LOC303067; similar to hypothetical protein FLJ20546          | 1.190 |
| CB606437            | LOC307816; similar to hypothetical protein E330010G16        | 1.189 |
| BQ204179            |                                                              | 1.188 |
| CB546141            | Cdc10; CDC10 (cell division cycle 10, S.cerevisiae, homolog) | 1.187 |
| AW520755            |                                                              | 1.185 |
| BF566642            |                                                              | 1.185 |
| XM_218983           |                                                              | 1.184 |
| BF396282            | Kns17; kinesin-like 7                                        | 1.181 |
| BM391982            |                                                              | 1.181 |
| CB548197            | LOC292464; similar to lipotransin                            | 1.180 |
| CB578360            | LOC299996; similar to matrilin 2                             | 1.180 |
| AI111940            |                                                              | 1.177 |
| CB545352            | LOC290529; similar to DNA segment, Chr 14, ERATO Doi 44      | 1.175 |
| CB545088            | LOC311903; similar to RIKEN cDNA 2400002D02                  | 1.175 |
| CB545509            | LOC310859; similar to KIAA1546 protein                       | 1.174 |
| NM_147177           | Ruvb1; RuvB-like protein 1                                   | 1.171 |
| BF405897            | LOC301114; similar to hypothetical protein MGC34725          | 1.171 |
| BF555968            | LOC291044; similar to Enhancer of filamentation 1 (MEF1) (Cl | 1.170 |
| X95849.1            |                                                              | 1.170 |
| NM_032462           | Csen; calsenilin, presenilin binding protein, EF hand transc | 1.170 |
| AI711102            | LOC299186; similar to cer-d4 isoform XZ                      | 1.169 |
| CB548258            |                                                              | 1.169 |
| BQ202118            | ErbB3; avian erythroblastosis oncogene B 3                   | 1.168 |
| CB546521            |                                                              | 1.167 |
| NM_080893           | Pde11a; phosphodiesterase 11A                                | 1.167 |
| NM_058208           | Cish2; cytokine inducible SH2-containing protein 2           | 1.165 |
| BE104095            |                                                              | 1.165 |
| BU670768            | Slc35b2; solute carrier family 35, member B2                 | 1.165 |
| BG375951            |                                                              | 1.163 |

|                     |                                                             |       |
|---------------------|-------------------------------------------------------------|-------|
| CB546373            | LOC303024; similar to F-box and WD-40 domain protein 1B     | 1.161 |
| U20298.1            |                                                             | 1.161 |
| NM_053703           | Map2k6; mitogen-activated protein kinase kinase 6           | 1.160 |
| CB548233            | LOC287773; similar to mKIAA0054 protein                     | 1.159 |
| NM_019308           |                                                             | 1.159 |
| BE116153            | LOC308839; similar to HBV pX associated protein 8 large iso | 1.159 |
| AI043877            |                                                             | 1.157 |
| CB605581            | LOC305101; similar to 6820428L09 protein                    | 1.157 |
| BF567064            | LOC313052; similar to protein 4.1, P4.1 - mouse             | 1.155 |
| BF523024            | LOC361384; similar to heat shock protein 40                 | 1.153 |
| BQ210837            | LOC364974; similar to Ribonuclease HI large subunit (RNase  | 1.153 |
| NM_012726           | Sca1; spinocerebellar ataxia 1 homolog (human)              | 1.153 |
| NM_012671           | Tgfa; transforming growth factor alpha                      | 1.151 |
| BF564580            | LOC299735; similar to hypothetical protein MGC35366         | 1.150 |
| BQ205267            |                                                             | 1.150 |
| AI170406            |                                                             | 1.149 |
| CB544340            | LOC287571; similar to TBP-associated factor 15 isoform 1; T | 1.149 |
| NM_080698           | Fmod; fibromodulin                                          | 1.148 |
| CB605941            | Rgs11; regulator of G-protein signaling 11                  | 1.147 |
| BQ200585            |                                                             | 1.146 |
| AW917374            | LOC301570; similar to putative nuclear protein              | 1.145 |
| BI291102            |                                                             | 1.143 |
| CB547585            | LOC308445; similar to cytochrome P450, family 2, subfamily  | 1.143 |
| S82585.1            |                                                             | 1.142 |
| AA848337            | LOC316035; similar to Da2-17                                | 1.142 |
| NM_053433           | Fmo3; flavin-containing monooxygenase 3                     | 1.140 |
| CB548136            | LOC364420; similar to TRAIL receptor2 KILLER/DR5 homolo     | 1.139 |
| BM386666            | LOC362076; similar to Interleukin 1 family member 8 (IL-1F8 | 1.138 |
| NM_023092           | Myr2; unconventional myosin Myr2 I heavy chain              | 1.136 |
| NM_013414           | Bglap; bone gamma-carboxyglutamate protein                  | 1.134 |
| AI231286            |                                                             | 1.133 |
| BF562697            |                                                             | 1.133 |
| CB546129            | LOC362794; similar to KIAA0602 protein                      | 1.132 |
| BQ209756            | LOC316085; similar to 106 kDa O-GlcNAc transferase-intera   | 1.131 |
| CB547168            | LOC310700; similar to LBA                                   | 1.131 |
| AM:ARGI1-027184-CYA |                                                             | 1.130 |
| BQ209066            |                                                             | 1.129 |
| BF521811            | Sez6; seizure related gene 6                                | 1.129 |
| NM_012621           | Pfkfb1; 6-phosphofructo-2-kinase/fructose-2,6-biphosphatase | 1.128 |
| BF565284            | Psip2; PC4 and SFRS1 interacting protein 2                  | 1.128 |
| BE126779            |                                                             | 1.127 |
| AI716757            |                                                             | 1.125 |
| AI145181            |                                                             | 1.125 |
| AW525987            | PRP-2; proline-rich protein                                 | 1.124 |
| BG375921            |                                                             | 1.124 |
| BF398521            |                                                             | 1.120 |
| AI228244            |                                                             | 1.120 |
| BF285469            |                                                             | 1.119 |
| NM_019297           | Chrn2; cholinergic receptor, nicotinic, beta polypeptide 2  | 1.116 |
| CB545929            | LOC361811; similar to serine/arginine-rich protein specific | 1.116 |
| BE112940            |                                                             | 1.114 |
| AI179624            |                                                             | 1.113 |

|            |                                                                |       |
|------------|----------------------------------------------------------------|-------|
| BF419627   |                                                                | 1.113 |
| CB546823   | LOC360887; similar to Cabcl1 protein                           | 1.110 |
| AF473844.1 |                                                                | 1.109 |
| BF284887   |                                                                | 1.107 |
| AI576144   | LOC363135; similar to steroid receptor-interacting SNF2 domain | 1.104 |
| AI576375   |                                                                | 1.102 |
| NM_012965  |                                                                | 1.101 |
| AF077000.1 |                                                                | 1.101 |
| BQ211559   |                                                                | 1.099 |
| BF545829   |                                                                | 1.099 |
| AI710695   | LOC64183; myomegalin                                           | 1.098 |
| CB546089   |                                                                | 1.098 |
| CB545909   | Pax1; paired box gene 1                                        | 1.096 |
| NM_022935  | Abp1; amiloride binding protein 1                              | 1.096 |
| AA012679   |                                                                | 1.095 |
| NM_017327  | Gnao1; guanine nucleotide binding protein, alpha o             | 1.095 |
| AW918961   |                                                                | 1.092 |
| NM_022604  | Esm1; endothelial cell-specific molecule 1                     | 1.092 |
| NM_020072  | Acpp; acid phosphatase, prostate                               | 1.092 |
| BF418038   |                                                                | 1.091 |
| CB606353   |                                                                | 1.090 |
| CB548298   | LOC287607; similar to FYVE zinc finger phosphatase             | 1.088 |
| CB578819   | LOC313302; similar to odd Oz/ten-m homolog 1                   | 1.088 |
| BI275243   | LOC294754; similar to Pelo protein                             | 1.086 |
| BF566863   | LOC316732; similar to RIKEN cDNA 4931400A14                    | 1.085 |
| BF554321   | LOC300147; similar to SET binding factor 1 (Sbf1) (Myotubular) | 1.084 |
| NM_012565  | Gck; glucokinase                                               | 1.083 |
| CA338776   | LOC310758; similar to Cappa1 protein                           | 1.082 |
| BF542557   | LOC314633; similar to mBLVR                                    | 1.082 |
| NM_030992  | Pld1; phospholipase D1                                         | 1.081 |
| CB546822   | Atm; ataxia telangiectasia mutated homolog (human)             | 1.080 |
| AA818099   |                                                                | 1.080 |
| NM_052799  | Nos1; nitric oxide synthase 1, neuronal                        | 1.079 |
| BQ210664   | LOC315761; similar to cartilage intermediate layer protein,    | 1.079 |
| AW143866   |                                                                | 1.078 |
| BQ203443   | LOC303702; similar to RIKEN cDNA D230014K01                    | 1.078 |
| AI704904   |                                                                | 1.077 |
| BF563757   |                                                                | 1.077 |
| AI145957   | Prkg1; cGMP dependent protein kinase type1                     | 1.076 |
| CB547940   | LOC291534; similar to RNA (guanine-7-) methyltransferase       | 1.075 |
| CB606112   | Hip1; huntingtin interacting protein 1                         | 1.074 |
| NM_030995  | Mtap1a; microtubule-associated protein 1 A                     | 1.073 |
| CB547599   | LOC360955; similar to Epididymis-specific alpha-mannosidase    | 1.073 |
| BF418926   |                                                                | 1.072 |
| BQ208297   |                                                                | 1.072 |
| AI072161   |                                                                | 1.071 |
| AI713313   |                                                                | 1.070 |
| BF556693   |                                                                | 1.070 |
| BF521886   |                                                                | 1.069 |
| AA819458   | LOC292044; similar to hypothetical protein                     | 1.067 |
| NM_012799  | Nmbr; neuromedin B receptor                                    | 1.067 |
| NM_012764  | Gata1; GATA binding protein 1                                  | 1.067 |

|                     |                                                             |       |
|---------------------|-------------------------------------------------------------|-------|
| CB548209            | LOC300259; similar to RIKEN cDNA D030041N15                 | 1.067 |
| CB547821            |                                                             | 1.067 |
| CB546267            | LOC304601; similar to TTF-I interacting protein 5           | 1.066 |
| AI716248            | LOC361749; similar to RIKEN cDNA 9230117N10                 | 1.066 |
| CB606188            | LOC301096; similar to testis protein TEX15                  | 1.065 |
| BF555774            | LOC362220; similar to Protein C20orf103 precursor           | 1.065 |
| BQ202892            | Notch2; notch gene homolog 2, (Drosophila)                  | 1.063 |
| CB545662            |                                                             | 1.063 |
| BF567896            |                                                             | 1.062 |
| NM_031126           | Stxbp2; syntaxin binding protein Munc18-2                   | 1.059 |
| CA506295            |                                                             | 1.059 |
| BG671163            | LOC302248; similar to Nidogen 2                             | 1.057 |
| AI072251            |                                                             | 1.056 |
| NM_024484           | Alas1; aminolevulinic acid synthase 1                       | 1.055 |
| BF563915            | LOC302950; similar to adenyl cyclase type 9                 | 1.055 |
|                     | 1185280                                                     | 1.054 |
| BQ201826            | Ccng2; cyclin G2                                            | 1.053 |
| BF550875            | LOC363413; similar to MIC2 like 1; single-pass transmembra  | 1.053 |
| BE349717            | LOC311088; similar to cobl-related 1                        | 1.052 |
| CB548442            |                                                             | 1.052 |
| BQ199604            |                                                             | 1.052 |
| BM387057            |                                                             | 1.049 |
| BE103235            |                                                             | 1.049 |
| CB548391            |                                                             | 1.048 |
| X13905.1            |                                                             | 1.047 |
| AI228100            | LOC304280; similar to hypothetical protein                  | 1.044 |
| CB547549            | LOC302378; similar to P2Y purinoceptor 9 (P2Y9) (Purinergic | 1.042 |
| CB546798            | LOC292127; similar to SNM1 protein                          | 1.042 |
| NM_172091           | Gcgr; glucagon receptor                                     | 1.042 |
| BF558075            | LOC315702; similar to DKFZP434H132 protein                  | 1.042 |
| AW533988            |                                                             | 1.042 |
| NM_017066           | Ptn; pleiotrophin                                           | 1.040 |
| CB605872            | LOC363029; similar to 2310047B19Rik protein                 | 1.040 |
| AW917271            | LOC310801; similar to zinc transporter like 2               | 1.040 |
| CB544820            |                                                             | 1.039 |
| AI007758            | LOC296456; similar to integrin alpha v subunit              | 1.039 |
| CB548453            | LOC362712; similar to hypothetical protein                  | 1.038 |
| NM_053847           | Map3k8; mitogen-activated protein kinase kinase kinase 8    | 1.038 |
| NM_013089           | Gys2; glycogen synthase 2                                   | 1.037 |
| BQ781225            |                                                             | 1.036 |
| CB546618            | Zdhhc21; zinc finger, DHHC domain containing 21             | 1.035 |
| CB605843            | LOC362694; similar to hypothetical protein FLJ23451         | 1.035 |
| NM_013135           | Rasa1; RAS p21 protein activator 1                          | 1.033 |
| NM_023956           | Gucy1a2; soluble guanylyl cyclase alpha2 subunit            | 1.033 |
| CB548228            | Ng22; Ng22 protein                                          | 1.032 |
| CB544815            | LOC297428; similar to coat protein gamma-cop                | 1.031 |
| NM_053899           | Cgr19; cell growth regulatory with ring finger domain       | 1.031 |
| BM385367            |                                                             | 1.030 |
| AM:ARGI1-036995-CYA |                                                             | 1.030 |
| NM_133545           | Ptp2E; protein tyrosine phosphatase 2E                      | 1.030 |
| BG665290            | LOC317396; similar to Ubqln2 protein                        | 1.028 |
| AI176825            |                                                             | 1.028 |

|                     |                                                              |       |
|---------------------|--------------------------------------------------------------|-------|
| CB546424            | LOC310807; similar to 2810453L12Rik protein                  | 1.027 |
| CB545676            | LOC308389; similar to Glucocorticoid receptor DNA binding f  | 1.025 |
| BF544414            |                                                              | 1.024 |
| NM_022242           | Niban; niban protein                                         | 1.024 |
| BQ196383            |                                                              | 1.023 |
| AW141655            | LOC288719; similar to tyrosylprotein sulfotransferase-2; TPS | 1.023 |
| BF524318            | LOC361588; similar to Leucine-rich repeat protein SHOC-2 (l  | 1.022 |
| AI575619            |                                                              | 1.021 |
| NM_017148           | Csrp1; cysteine and glycine-rich protein 1                   | 1.020 |
| NM_080577           | Npl4; homolog of yeast nuclear protein localization 4        | 1.018 |
| BF286419            |                                                              | 1.018 |
| NM_012668           | Tat; tyrosine aminotransferase                               | 1.015 |
| BF393798            |                                                              | 1.015 |
| CB545546            | LOC362107; similar to ionized calcium binding adapter molec  | 1.015 |
| AM:ARGI1-026271-CYA |                                                              | 1.015 |
| BE114260            |                                                              | 1.014 |
| BF556456            |                                                              | 1.013 |
| NM_031124           | Stx3a; syntaxin 3                                            | 1.011 |
| CB606300            | LOC306698; similar to putative repair and recombination heli | 1.011 |
| AF136584.1          |                                                              | 1.010 |
| NM_053652           | Flt4; fms-related tyrosine kinase 4                          | 1.007 |
| NM_023104           | LOC65984; acetoacetyl-CoA synthetase                         | 1.007 |
| AI410219            | LOC316335; similar to RW1 protein                            | 1.007 |
| BM389600            |                                                              | 1.007 |
| BF411285            | LOC309173; similar to expressed sequence AW491445            | 1.006 |
| BU671525            | Bmp1; bone morphogenetic protein 1 (procollagen C-proetina   | 1.006 |
| CB545544            | LOC361281; similar to tumor endothelial marker 7-related pr  | 1.004 |
| NM_012686           | Vsnl1; visinin-like 1                                        | 1.004 |
| AI408996            | LOC296285; similar to 2310010I22Rik protein                  | 1.003 |
| NM_019190           | Mcp; membrane cofactor protein                               | 1.003 |
| CB547643            |                                                              | 1.001 |
| AA925349            |                                                              | 1.000 |
| BQ782858            | LOC291440; similar to CpG binding protein                    | 0.999 |
| CB606161            | LOC361705; similar to cornichon-like protein                 | 0.996 |
| D26499.1            |                                                              | 0.995 |
| AI008694            |                                                              | 0.994 |
| AA955360            |                                                              | 0.992 |
| CB544722            | LOC306387; similar to hypothetical protein BC008207          | 0.991 |
| CB545150            | LOC287530; similar to splicing factor Prp8                   | 0.988 |
| NM_019227           | Itsn; intersectin 1                                          | 0.988 |
| CB544341            | Kif1b; kinesin family member 1B                              | 0.987 |
| AA859923            |                                                              | 0.987 |
| CB547453            | Prkca; protein kinase C, alpha                               | 0.987 |
| CB546468            |                                                              | 0.984 |
| AA818298            | LOC294679; SLO-interacting ankyrin-containing protein        | 0.984 |
| BQ203221            |                                                              | 0.984 |
| BQ204380            | LOC310645; similar to RIKEN cDNA 1110011E12                  | 0.983 |
| NM_012816           | Amacr; alpha-methylacyl-CoA racemase                         | 0.983 |
| BF523808            | LOC293566; similar to carboxypeptidase X 2 (M14 family); c   | 0.979 |
| NM_134432           | Agt; angiotensinogen                                         | 0.979 |
| CB545938            | LOC304469; similar to 2900002H16Rik protein                  | 0.978 |
| NM_080410           | Syt14; synaptotagmin-like 4 (granuphilin-a)                  | 0.977 |

|           |                                                             |       |
|-----------|-------------------------------------------------------------|-------|
| NM_133291 | Sval2; seminal vesicle antigen-like 2                       | 0.977 |
| CA334525  | LOC307505; similar to Alpha-1 catenin (Cadherin-associated  | 0.977 |
| NM_053967 | Spam; sperm adhesion molecule                               | 0.976 |
| AW920723  | LOC304759; similar to RAB3 GTPase-activating protein        | 0.975 |
| CB544480  |                                                             | 0.974 |
| NM_138849 | Bk; B/K protein                                             | 0.974 |
| BF410603  |                                                             | 0.974 |
| CB547310  | LOC308449; similar to hypothetical protein                  | 0.972 |
| AI233877  |                                                             | 0.970 |
| CB548515  | LOC304885; similar to RIKEN cDNA C530043G21 gene            | 0.970 |
| BF408460  |                                                             | 0.969 |
| AI555796  |                                                             | 0.969 |
| BM385333  |                                                             | 0.969 |
| L07318.1  |                                                             | 0.968 |
| NM_022211 |                                                             | 0.967 |
| BM382865  |                                                             | 0.966 |
| CB544774  | LOC291624; similar to leucyl-tRNA synthetase                | 0.966 |
| BF389244  |                                                             | 0.965 |
| AI948410  | LOC307156; similar to hypothetical protein FLJ32827         | 0.965 |
| BF554907  |                                                             | 0.964 |
| CB605895  | LOC362547; similar to Dolichyl pyrophosphate Man9GlcNAc2    | 0.963 |
| NM_053995 |                                                             | 0.963 |
| CB546174  | LOC294429; similar to Ran-binding protein 2                 | 0.963 |
| CA507280  |                                                             | 0.963 |
| CB545327  | LOC305332; similar to hypothetical protein                  | 0.962 |
| AA925484  |                                                             | 0.962 |
| CB546720  | LOC293645; similar to PTPRF interacting protein alpha 1 iso | 0.962 |
| XM_234500 | LOC299285; similar to calmin alpha                          | 0.961 |
| CB547828  |                                                             | 0.961 |
| NM_013134 | Hmgcr; 3-hydroxy-3-methylglutaryl-Coenzyme A reductase      | 0.960 |
| CB546528  | Ank2; ankyrin 2, brain                                      | 0.960 |
| NM_021684 | LOC59320; soluble adenyl cyclase                            | 0.960 |
| AI237388  | LOC300994; similar to IRFD2                                 | 0.956 |
| CB545066  |                                                             | 0.955 |
| AI500900  | LOC287796; similar to chromosome 17 open reading frame 2    | 0.955 |
| BU759048  | LOC298654; similar to 5730438N18Rik protein                 | 0.952 |
| M58040.1  |                                                             | 0.952 |
| CB544285  | LOC308212; similar to dapper2                               | 0.951 |
| BE113554  |                                                             | 0.951 |
| NM_031776 | Gda; guanine deaminase                                      | 0.950 |
| NM_013189 | Gnaz; guanine nucleotide binding protein, alpha z subunit   | 0.950 |
| BQ193834  | LOC294594; similar to RIKEN cDNA 1700030K01                 | 0.949 |
| AA818611  |                                                             | 0.949 |
| NM_053890 | Mypt1; myosin phosphatase, target subunit 1                 | 0.949 |
| NM_019315 | Kcnn3; potassium intermediate/small conductance calcium-a   | 0.948 |
| AW918973  | LOC305556; similar to KIAA0903-like protein                 | 0.945 |
| BQ193814  |                                                             | 0.945 |
| CA511186  | LOC313591; similar to thyroid hormone receptor-associated p | 0.943 |
| BE098837  | LOC362056; similar to RIKEN cDNA 4921536I21                 | 0.943 |
| NM_031615 | Znf148; zinc finger protein 148                             | 0.942 |
| BE121382  | LOC314405; similar to RIKEN cDNA 4930586I02                 | 0.942 |
| CB545373  | LOC361982; similar to thrombospondin 3                      | 0.941 |

|                     |                                                                   |       |
|---------------------|-------------------------------------------------------------------|-------|
| CB544458            | LOC315179; similar to RIKEN cDNA 4931407K02                       | 0.938 |
| AM:ARGI1-029288-CYA |                                                                   | 0.938 |
| D85798              | LOC289227; similar to T-lymphocyte surface antigen Ly-9 precursor | 0.937 |
| BE107734            | LOC293117; similar to RIKEN cDNA 4933417L02                       | 0.936 |
| BI289483            | LOC310008; similar to Ras GTPase-activating-like protein IQ       | 0.933 |
| BF562816            |                                                                   | 0.932 |
| AA924565            |                                                                   | 0.932 |
| NM_012544           | Ace; angiotensin 1 converting enzyme 1                            | 0.931 |
| NM_031771           | Thbd; thrombomodulin                                              | 0.929 |
| NM_022180           | Hnf4a; hepatocyte nuclear factor 4, alpha                         | 0.928 |
| NM_030856           | Lrrn3; leucine rich repeat protein 3, neuronal                    | 0.927 |
| BG380318            | LOC305268; similar to RIKEN cDNA 5730469D23                       | 0.925 |
| NM_031700           | Cldn3; claudin 3                                                  | 0.925 |
| NM_080480           | Pip5k2c; phosphatidylinositol-4-phosphate 5-kinase, type II,      | 0.924 |
| AA875457            |                                                                   | 0.923 |
| BI274672            |                                                                   | 0.923 |
| BF392619            |                                                                   | 0.919 |
| CB605724            | LOC301535; similar to RIKEN cDNA 1200014D22                       | 0.919 |
| AA818626            |                                                                   | 0.917 |
| CB546703            | LOC295934; similar to galactose 6-O-sulfotransferase GST-1        | 0.917 |
| NM_022849           |                                                                   | 0.916 |
| AA819208            |                                                                   | 0.915 |
| BF546815            |                                                                   | 0.915 |
| AM:ARGI1-025981-CYA |                                                                   | 0.915 |
| NM_017095           | Cebpe; CCAAT/enhancer binding protein , epsilon                   | 0.913 |
| CB546509            | LOC300653; similar to alpha tectorin                              | 0.913 |
| NM_052980           | Nr1i2; nuclear receptor subfamily 1, group 1, member 2            | 0.910 |
| CB545871            | LOC296384; similar to Ab1-133                                     | 0.910 |
| AI231615            |                                                                   | 0.909 |
| AA818113            | LOC289113; similar to RIKEN cDNA 2610318G18                       | 0.908 |
| CB544677            |                                                                   | 0.905 |
| BI296636            |                                                                   | 0.904 |
| NM_134377           | Cstn2; calsyntenin 2                                              | 0.903 |
| NM_053919           | Ceacam9; CEA-related cell adhesion molecule 9                     | 0.903 |
| NM_032069           | Grip1; Glutamate receptor interacting protein                     | 0.903 |
| BQ204955            | LOC308843; similar to hypothetical protein, estradiol-induce      | 0.902 |
| NM_012988           | Nfia; nuclear factor I/A                                          | 0.902 |
| CB548100            | LOC363185; similar to fork head-related protein like A            | 0.901 |
| AA925183            |                                                                   | 0.900 |
| AI112311            | LOC305850; similar to RPGR-interacting protein                    | 0.897 |
| BM392311            | LOC310820; similar to polypyrimidine tract binding protein 2      | 0.896 |
| NM_031971           | Hspa1a; heat shock 70kD protein 1A                                | 0.895 |
| AW143179            | LOC315851; similar to Elovl4                                      | 0.894 |
| AA958009            |                                                                   | 0.893 |
| NM_053727           | Nfil3; nuclear factor, interleukin 3, regulated                   | 0.893 |
| BE114116            | LOC306544; similar to Proline synthetase associated               | 0.893 |
| BF287849            | LOC295602; similar to CG6004-PB                                   | 0.893 |
| CB547064            |                                                                   | 0.892 |
| CB547226            | LOC311580; similar to SAM domain and HD domain-containi           | 0.892 |
| CB547738            |                                                                   | 0.890 |
| AI137781            | LOC364903; similar to KIAA0437                                    | 0.889 |
| CB545344            | LOC313166; similar to cysteine-rich protein NFX-1                 | 0.889 |

|                     |                                                              |       |
|---------------------|--------------------------------------------------------------|-------|
| CA338912            | LOC314613; similar to RIKEN cDNA 2610010O19                  | 0.887 |
| CB548115            |                                                              | 0.887 |
| NM_130822           | Cirl3; calcium-independent alpha-latrotoxin receptor homolog | 0.886 |
| BF542726            | LOC315524; similar to cDNA sequence BC018222                 | 0.885 |
| AW916035            | LOC288051; similar to Umps protein                           | 0.885 |
| BF398356            |                                                              | 0.884 |
| AI059481            | Nrxn3; neurexin 3                                            | 0.884 |
| CB545197            | LOC360956; similar to RIKEN cDNA 2810413P16                  | 0.883 |
| AW521764            | LOC363017; similar to RIKEN cDNA 4930553M18                  | 0.883 |
| D14015.1            |                                                              | 0.882 |
| BF561639            | LOC306886; similar to RIP                                    | 0.881 |
| AM:ARGI1-026504-CYA |                                                              | 0.880 |
| BF387125            |                                                              | 0.880 |
| NM_012519           | Camk2d; calcium/calmodulin-dependent protein kinase II, del  | 0.879 |
| BF543745            |                                                              | 0.878 |
| CB546711            |                                                              | 0.877 |
| H34224              |                                                              | 0.877 |
| CB546626            | LOC309757; similar to Sir2alpha protein                      | 0.876 |
| AI176590            | LOC299982; similar to RIKEN cDNA C730048E16                  | 0.876 |
| CB545514            | LOC316457; similar to FYVE finger-containing phosphoinosit   | 0.876 |
| NM_053649           | Kremen; kringle-coding gene marking the eye and the nose     | 0.876 |
| BF391686            |                                                              | 0.876 |
| NM_031543           | Cyp2e1; cytochrome P450, subfamily 2E, polypeptide 1         | 0.874 |
| NM_013059           | Alpl; alkaline phosphatase, tissue-nonspecific               | 0.874 |
| AA955156            |                                                              | 0.872 |
| BF288631            | LOC314075; similar to intracellular membrane-associated ca   | 0.871 |
| BF392974            |                                                              | 0.870 |
| NM_133318           | Slm1; Sam68-like mammalian protein 1                         | 0.869 |
| BM385096            | LOC303694; similar to SEC14-like 1                           | 0.868 |
| AW251335            | LOC363028; similar to RIKEN cDNA 2410030K01                  | 0.868 |
| BQ207181            |                                                              | 0.867 |
| D83014.1            |                                                              | 0.865 |
| BQ191979            | LOC295070; similar to TRALPUSH; no opposite paired repea     | 0.864 |
| AI007838            |                                                              | 0.864 |
| X89699.1            |                                                              | 0.863 |
| BF409078            |                                                              | 0.863 |
| CB545442            |                                                              | 0.862 |
| CB545021            | LOC314388; similar to KIAA2010 protein                       | 0.862 |
| CB546182            | LOC361837; similar to RUFY2                                  | 0.861 |
| AI407847            |                                                              | 0.860 |
| AJ286820.1          |                                                              | 0.860 |
| NM_139041           |                                                              | 0.858 |
| CB606429            | LOC363160; similar to Oligosaccharyl transferase 3 CG7748    | 0.858 |
| AA956095            |                                                              | 0.858 |
| AI579087            | LOC304775; similar to Dual-specificity tyrosine-(Y)-phosphor | 0.857 |
| AW527182            |                                                              | 0.857 |
| BF559884            | LOC287392; similar to tektin 3; testicular microtubules-rela | 0.857 |
| AA957312            |                                                              | 0.856 |
| AA945912            |                                                              | 0.856 |
| NM_017297           | Kcnj5; potassium inwardly-rectifying channel, subfamily J, m | 0.856 |
| BQ202809            | Gclc; glutamate-cysteine ligase catalytic subunit            | 0.855 |
| NM_130403           | Ppp1r14a; protein phosphatase 1, regulatory (inhibitor) subu | 0.855 |

|            |                                                             |       |
|------------|-------------------------------------------------------------|-------|
| BI277355   |                                                             | 0.854 |
| CB547985   |                                                             | 0.854 |
| NM_019148  | Strn; striatin                                              | 0.854 |
| BM385355   | LOC360478; LOC360478                                        | 0.853 |
| NM_053482  | Sp17; sperm autoantigenic protein 17                        | 0.852 |
| AA965058   | LOC360984; similar to homoloc-13                            | 0.852 |
| NM_031783  | Nfl; neurofilament, light polypeptide                       | 0.851 |
| BF563180   | LOC308575; similar to Fig-1 protein                         | 0.849 |
| CB581986   | LOC301336; similar to Rho guanine nucleotide exchange fac   | 0.849 |
| BI303593   |                                                             | 0.848 |
| BE103543   | Recc1; replication factor C                                 | 0.847 |
| CB544406   | LOC361604; similar to synaptotagmin-like protein 2          | 0.846 |
| NM_031091  | Rab3b; Rab3B protein                                        | 0.846 |
| AF021350.1 |                                                             | 0.845 |
| CB544449   | LOC307151; similar to transforming protein bmi1 - mouse     | 0.843 |
| BQ190144   | LOC363059; similar to centromere/kinetochore protein zw10   | 0.842 |
| CB547864   | LOC308488; similar to hypothetical protein FLJ36991         | 0.841 |
| BI276058   | LOC308099; similar to KIAA1866 protein                      | 0.841 |
| AI712638   | LOC303251; similar to Dishevelled 2, dsh homolog            | 0.840 |
| AI101392   | LOC362149; similar to CBF1 interacting corepressor          | 0.840 |
| BQ202832   | LOC313052; similar to protein 4.1, P4.1 - mouse             | 0.839 |
| NM_023027  | Scep43; tRNA selenocysteine associated protein              | 0.839 |
| BM383330   |                                                             | 0.836 |
| CB545783   | LOC293678; similar to MUS81 endonuclease                    | 0.836 |
| NM_032082  | Hao3; hydroxyacid oxidase (glycolate oxidase) 3             | 0.836 |
| AA799561   |                                                             | 0.836 |
| U78121.1   |                                                             | 0.835 |
| CB545379   | LOC294431; similar to chromosome 6 open reading frame 18    | 0.834 |
| BF559454   |                                                             | 0.834 |
| CB546580   | LOC301309; similar to Brain-specific angiogenesis inhibitor | 0.832 |
| BF404460   |                                                             | 0.832 |
| BI295155   |                                                             | 0.831 |
| BG665445   | Crmp4; dihydropyrimidinase-like 3                           | 0.830 |
| AI556632   |                                                             | 0.829 |
| AA818474   | Rpl31; ribosomal protein L31                                | 0.827 |
| AA957707   | LOC313521; similar to RIKEN cDNA A830048M07                 | 0.826 |
| NM_017352  | Nr4a3; nuclear receptor subfamily 4, group A, member 3      | 0.825 |
| NM_017238  | Vipr2; vasopressive intestinal peptide receptor 2           | 0.824 |
| BF397419   |                                                             | 0.823 |
| BF283250   | LOC316067; similar to xylulokinase homolog; xylulokinase (H | 0.822 |
| CB606203   | LOC312682; similar to BCL2-like 13                          | 0.819 |
| BF283714   |                                                             | 0.818 |
| AA858882   | Zfp36; zinc finger protein 36                               | 0.818 |
| BF563583   |                                                             | 0.817 |
| BQ203680   | LOC310772; similar to 2010308M01Rik protein                 | 0.817 |
| BM385478   |                                                             | 0.816 |
| BI281856   |                                                             | 0.816 |
| AF083418.1 |                                                             | 0.816 |
| BF404275   | LOC288482; similar to hypothetical protein FLJ12851         | 0.815 |
| CB548467   | LOC306622; hypothetical LOC306622                           | 0.815 |
| CB547844   |                                                             | 0.814 |
| BI276447   | LOC362149; similar to CBF1 interacting corepressor          | 0.814 |

|            |                                                                |       |
|------------|----------------------------------------------------------------|-------|
| L21672.1   |                                                                | 0.813 |
| NM_012889  | Vcam1; vascular cell adhesion molecule 1                       | 0.813 |
| BF416982   |                                                                | 0.813 |
| BE105541   | Cyp26b1; cytochrome P450, family 26, subfamily b, polypeptide  | 0.812 |
| CB544498   | LOC362015; similar to adenosine monophosphate deaminase        | 0.812 |
| BF402582   |                                                                | 0.812 |
| BE110688   | LOC360521; similar to RUN and FYVE domain containing 1;        | 0.811 |
| BE095691   | Srp54; signal recognition particle 54 kDa                      | 0.811 |
| CB606422   | LOC361072; similar to Calponin homology domain containing      | 0.810 |
| AI179541   |                                                                | 0.810 |
| CB544942   | Dfna5h; deafness, autosomal dominant 5 homolog (human)         | 0.810 |
| AA955624   |                                                                | 0.810 |
| AI228728   |                                                                | 0.808 |
| CB547903   | LOC308976; similar to RIKEN cDNA 3110005O21                    | 0.808 |
| CA339340   |                                                                | 0.806 |
| AI029751   | LOC313927; similar to DNA methyltransferase 3A                 | 0.805 |
| NM_138836  | Prss8; protease, serine, 8 (prostasin)                         | 0.804 |
| CB605956   | Numb; numb gene homolog (Drosophila)                           | 0.803 |
| NM_173322  | Prol2; proline rich 2                                          | 0.801 |
| CB544902   | LOC299078; similar to Meningioma expressed antigen 6 (coil)    | 0.801 |
| AI137233   | LOC361293; similar to sudD, suppressor of bimD6 homolog        | 0.801 |
| BQ202229   |                                                                | 0.801 |
| CB547381   | LOC361015; similar to ataxin-7                                 | 0.801 |
| NM_024127  | Gadd45a; growth arrest and DNA-damage-inducible 45 alpha       | 0.799 |
| BE113159   | LOC293112; similar to tyrosine kinase-associated leucine zip   | 0.799 |
| CB547856   |                                                                | 0.797 |
| CB547743   |                                                                | 0.795 |
| AI007753   |                                                                | 0.794 |
| AF390079.1 |                                                                | 0.794 |
| AI410882   |                                                                | 0.794 |
| CB545854   | LOC313707; similar to P100 polymyositis-scleroderma overlap    | 0.794 |
| NM_053406  | Pomt1; protein O-mannosyltransferase 1                         | 0.793 |
| NM_032074  | Irs3; insulin receptor substrate 3                             | 0.793 |
| BF412134   |                                                                | 0.792 |
| BE096016   |                                                                | 0.792 |
| CB605842   | LOC290986; similar to nuclear ATP/GTP-binding protein          | 0.791 |
| NM_031757  | Mmp24; matrix metalloproteinase 24 (membrane-inserted)         | 0.791 |
| BF401793   | LOC367000; similar to G protein-coupled receptor 84            | 0.790 |
| BE116194   |                                                                | 0.790 |
| AI711376   | LOC302697; similar to Eukaryotic translation initiation factor | 0.790 |
| CB546025   | LOC360924; similar to 2810407P21Rik protein                    | 0.789 |
| CB605859   |                                                                | 0.788 |
| BF549037   |                                                                | 0.788 |
| CB547215   | Arl9; ADP-ribosylation factor-like 9                           | 0.787 |
| NM_012850  | Ghrhr; growth hormone releasing hormone receptor               | 0.787 |
| CB547973   |                                                                | 0.786 |
| CB546930   | LOC362426; similar to Ribosome biogenesis protein BMS1 homolog | 0.786 |
| NM_053641  | Cysltr1; cysteinyl leukotriene receptor 1                      | 0.786 |
| NM_013176  | Tcf12; transcription factor 12                                 | 0.784 |
| BQ207763   | LOC300732; similar to PEST phosphatase interacting protein     | 0.784 |
| CB546889   | LOC362637; LOC362637                                           | 0.784 |
| AA900113   |                                                                | 0.781 |

|                     |                                                                 |       |
|---------------------|-----------------------------------------------------------------|-------|
| NM_024403           | Atf4; activating transcription factor ATF-4                     | 0.781 |
| AI407927            |                                                                 | 0.778 |
| NM_012853           | Htr4; 5-hydroxytryptamine (serotonin) receptor 4                | 0.777 |
| CA509273            | LOC364672; similar to heterogeneous nuclear ribonucleoprotein   | 0.776 |
| AM:ARG11-028711-CYA |                                                                 | 0.776 |
| NM_017317           | ram; low Mr GTP-binding protein                                 | 0.776 |
| CB544398            | Ryr3; ryanodine receptor 3                                      | 0.775 |
| AI113077            |                                                                 | 0.775 |
| BG376146            | LOC306349; similar to Brain specific membrane-anchored protein  | 0.775 |
| AI716196            |                                                                 | 0.774 |
| CB606165            | LOC311886; similar to CENTRIOLIN                                | 0.774 |
| AA859053            |                                                                 | 0.772 |
| BG672283            |                                                                 | 0.771 |
| BE117715            |                                                                 | 0.769 |
| BQ195257            | LOC364890; similar to CHMP1.5 protein                           | 0.769 |
| NM_053906           | Gsr; glutathione reductase                                      | 0.768 |
| BF282900            |                                                                 | 0.767 |
| AI137157            | LOC366513; similar to Tnfrsf25 protein                          | 0.767 |
| NM_017061           | Lox; lysyl oxidase                                              | 0.767 |
| NM_021760           | Col5a3; collagen, type V, alpha 3                               | 0.766 |
| AI227987            |                                                                 | 0.766 |
| BF282476            | LOC291910; similar to RIKEN cDNA 2010013M14                     | 0.765 |
| BQ207701            |                                                                 | 0.765 |
| BM385955            |                                                                 | 0.765 |
| CB548294            | LOC317470; similar to hypothetical protein                      | 0.764 |
| NM_012523           | Cd53; CD53 antigen                                              | 0.764 |
| BF420605            | LOC307585; similar to cyclin-dependent kinase 3 interactor-1    | 0.764 |
| CB544374            | LOC298688; similar to RIKEN cDNA 2410006F12                     | 0.763 |
| BQ779931            |                                                                 | 0.762 |
| NM_053299           | Ubd; ubiquitin D                                                | 0.761 |
| NM_053754           | Abcg5; ATP-binding cassette, sub-family G (WHITE), member       | 0.760 |
| CB544630            |                                                                 | 0.760 |
| BE100650            | LOC306941; similar to leucine rich repeat containing 16         | 0.760 |
| CB545770            | LOC307766; similar to ATP-dependent chromatin remodeling        | 0.758 |
| BF551157            | LOC300691; similar to nicotinamide N-methyltransferase          | 0.757 |
| AI176079            | LOC308874; similar to nucleoporin 98kD isoform 1; nucleoporin   | 0.757 |
| AF311886.1          |                                                                 | 0.757 |
| AA819397            |                                                                 | 0.756 |
| AA924070            |                                                                 | 0.756 |
| BF558648            |                                                                 | 0.756 |
| BF283652            |                                                                 | 0.755 |
| NM_053838           | Npr2; natriuretic peptide receptor 2                            | 0.755 |
| BF566351            | LOC308654; hypothetical LOC308654                               | 0.753 |
| BQ200384            | LOC304580; similar to slingshot 1                               | 0.752 |
| CB544881            | LOC291733; similar to LIV-1 protein, estrogen regulated         | 0.752 |
| AI072958            |                                                                 | 0.750 |
| NM_031135           | Tieg; TGFB inducible early growth response                      | 0.749 |
| AI145119            |                                                                 | 0.749 |
| CB548424            | LOC360748; similar to DNA-dependent protein kinase catalytic    | 0.747 |
| AI136130            |                                                                 | 0.746 |
| BF406820            |                                                                 | 0.746 |
| AI137068            | LOC317464; similar to Male-specific lethal 3-like 1 (MSL3-like) | 0.746 |

|            |                                                                  |       |
|------------|------------------------------------------------------------------|-------|
| BF416676   | LOC362940; similar to cDNA sequence BC024139                     | 0.745 |
| AA926191   |                                                                  | 0.745 |
| NM_031022  | Cspg4; membrane-spanning proteoglycan NG2                        | 0.745 |
| BQ196681   | LOC312358; similar to RIKEN cDNA E130201N16                      | 0.745 |
| BF416274   | Chc1l; chromosome condensation 1-like                            | 0.744 |
| NM_021847  | Vapb; vesicle-associated membrane protein, associated prot       | 0.743 |
| NM_013005  | Pik3r1; phosphatidylinositol 3-kinase, regulatory subunit, p     | 0.743 |
| AF074880.1 |                                                                  | 0.743 |
| BG374689   |                                                                  | 0.743 |
| AF177698.1 |                                                                  | 0.742 |
| BF563046   | LOC299639; similar to RIKEN cDNA 5730519E19 gene                 | 0.741 |
| BI303289   |                                                                  | 0.740 |
| BQ782509   |                                                                  | 0.735 |
| D55648.1   |                                                                  | 0.735 |
| AW915945   | LOC292750; similar to common-site lymphoma/leukemia GE           | 0.735 |
| CB548306   | LOC315134; similar to RIKEN cDNA 1300006C06                      | 0.732 |
| AW916104   | LOC300666; similar to KIAA0285 gene product                      | 0.731 |
| AY082657.1 |                                                                  | 0.731 |
| BF288013   | LOC304337; similar to KRAB-containing zinc-finger protein K      | 0.731 |
| BE095820   | LOC366826; similar to small GTP-binding tumor suppressor         | 0.731 |
| NM_031634  | Mefv; Mediterranean fever                                        | 0.729 |
| CB545087   | LOC295934; similar to galactose 6-O-sulfotransferase GST-1       | 0.729 |
| CB544527   | LOC315880; similar to KIAA1055 protein                           | 0.728 |
| AF039308.1 |                                                                  | 0.728 |
| BE109971   | LOC287585; similar to Protein phosphatase 1D magnesium- $\alpha$ | 0.727 |
| AB012600.1 |                                                                  | 0.726 |
| CB545896   | LOC361431; similar to ETO/MTG8-related protein ETO-2             | 0.725 |
| NM_130817  | Fgf3; fibroblast growth factor 3                                 | 0.724 |
| CB548430   | LOC366950; similar to epiplakin                                  | 0.724 |
| CA333739   | LOC363448; similar to T-complex associated-testis-express        | 0.724 |
| BF566386   | Pou2f1; POU domain, class 2, transcription factor 1              | 0.724 |
| BE126320   |                                                                  | 0.723 |
| NM_012578  | H1f0; H1 histone family, member 0                                | 0.722 |
| AA850247   | LOC300514; similar to EI24                                       | 0.722 |
| NM_021687  | ErbB4; receptor tyrosine kinase                                  | 0.721 |
| X70667.1   |                                                                  | 0.721 |
| AF189709.1 |                                                                  | 0.721 |
| CB545020   |                                                                  | 0.720 |
| CB548417   | LOC312398; similar to mKIAA1122 protein                          | 0.720 |
| CB545786   | LOC287285; similar to KIAA1960 protein                           | 0.720 |
| BF228360.1 |                                                                  | 0.719 |
| BM390968   |                                                                  | 0.718 |
| CB546658   | LOC362873; similar to receptor for viral-encoded semaphorin      | 0.718 |
| D26496.1   |                                                                  | 0.718 |
| NM_022196  | Lif; leukemia inhibitory factor                                  | 0.716 |
| NM_012930  | Cpt2; carnitine palmitoyltransferase 2                           | 0.715 |
| NM_053910  | Pscd1; pleckstrin homology, Sec7 and coiled/coiled domains 1     | 0.714 |
| BG665929   |                                                                  | 0.713 |
| CB547355   | LOC299284; similar to Endoribonuclease Dicer (Double-strand)     | 0.712 |
| CB605620   | LOC295455; similar to RIKEN cDNA 4933419D20                      | 0.709 |
| AF010136.1 |                                                                  | 0.708 |
| CB547284   |                                                                  | 0.707 |

|           |                                                             |       |
|-----------|-------------------------------------------------------------|-------|
| M63991.1  |                                                             | 0.707 |
| NM_017300 | Baat; bile acid-Coenzyme A: amino acid N-acyltransferase    | 0.707 |
| CB547964  | LOC305645; similar to Discs, large homolog 5 (Placenta and  | 0.706 |
| AA924717  | LOC362618; similar to hypothetical protein BC008163         | 0.706 |
| NM_053811 | Slc9a3r2; solute carrier family 9 (sodium/hydrogen exchange | 0.706 |
| BF284283  | LOC298567; similar to elastase 3B, pancreatic               | 0.704 |
| BI290606  |                                                             | 0.704 |
| CB548350  |                                                             | 0.703 |
| BF562917  |                                                             | 0.703 |
| AA899782  |                                                             | 0.703 |
| CB547038  | LOC308389; similar to Glucocorticoid receptor DNA binding f | 0.702 |
| BF565100  | LOC361641; similar to RIKEN cDNA 3230401I01                 | 0.702 |
| AW534358  |                                                             | 0.702 |
| CB545845  | LOC313524; similar to mKIAA1511 protein                     | 0.700 |
| BF410589  |                                                             | 0.700 |
| NM_012951 | Fgf10; fibroblast growth factor 10                          | 0.700 |
| NM_012615 | Odc1; ornithine decarboxylase 1                             | 0.699 |
| NM_130410 |                                                             | 0.698 |
| AW529726  | LOC295228; similar to RIKEN cDNA 2610029K21                 | 0.698 |
| BM387864  | LOC367314; similar to FLI-LRR associated protein-1          | 0.697 |
| CB544967  | LOC308579; similar to carnitine palmitoyltransferase I      | 0.697 |
| NM_021868 | Cttnb; cortactin isoform B                                  | 0.695 |
| NM_012903 | Anp32a; acidic nuclear phosphoprotein 32 family, member A   | 0.695 |
| BF525079  | LOC312720; similar to protein kinase A binding protein AKAF | 0.694 |
| CB546836  | LOC288354; hypothetical LOC288354                           | 0.693 |
| CB606208  | LOC307098; similar to NET1 homolog                          | 0.693 |
| AI598321  | Npap60; nuclear pore associated protein                     | 0.692 |
| NM_134379 | UST4r; integral membrane transport protein UST4r            | 0.691 |
| CB544290  | LOC360628; similar to 65kDa FK506-binding protein           | 0.691 |
| AA955393  |                                                             | 0.689 |
| AI412876  |                                                             | 0.687 |
| AA819133  |                                                             | 0.686 |
| CB547250  | LOC305342; similar to Nedd4 binding protein 2; BCL-3 bindir | 0.686 |
| CB544886  | LOC297436; similar to RIKEN cDNA 0710001P09                 | 0.685 |
| NM_170668 | Nact; sodium-coupled citrate transporter                    | 0.685 |
| BF555121  |                                                             | 0.684 |
| M81784.1  |                                                             | 0.684 |
| BE113314  | LOC362380; similar to RIKEN cDNA 4432417F03                 | 0.684 |
| CB547236  | LOC360797; similar to Ras negative regulator Rabex-5/Rin2   | 0.683 |
| NM_031686 | Scn6a; sodium channel, voltage-gated, type 6, alpha polypep | 0.683 |
| BI285616  | ADRP; adipose differentiation-related protein               | 0.683 |
| AI137286  |                                                             | 0.683 |
| BE115041  |                                                             | 0.682 |
| CB544321  | LOC313166; similar to cysteine-rich protein NFX-1           | 0.682 |
| BI282744  | Pck1; phosphoenolpyruvate carboxykinase 1                   | 0.681 |
| BF420633  |                                                             | 0.680 |
| AI058968  |                                                             | 0.680 |
| BQ200688  |                                                             | 0.679 |
| NM_013157 | Ass; arginosuccinate synthetase                             | 0.679 |
| AA955616  |                                                             | 0.679 |
| NM_031081 | Pdpk1; 3-phosphoinositide dependent protein kinase-1        | 0.679 |
| NM_012845 | Ms4a2; membrane-spanning 4-domains, subfamily A, membe      | 0.677 |

|           |                                                                    |       |
|-----------|--------------------------------------------------------------------|-------|
| NM_145878 | Fabp5; fatty acid binding protein 5, epidermal                     | 0.677 |
| BF559864  | LOC314999; similar to RIKEN cDNA 4632406N01                        | 0.677 |
| NM_024388 | Nr4a1; immediate early gene transcription factor NGFI-B            | 0.676 |
| NM_017022 | Itgb1; integrin beta 1                                             | 0.676 |
| XM_222251 | LOC304569; similar to Domino                                       | 0.676 |
| BF555543  | LOC360584; similar to dioxin inducible factor 3                    | 0.675 |
| AA818386  |                                                                    | 0.674 |
| AI070982  | LOC306237; similar to retinoblastoma-associated protein 140        | 0.674 |
| BF283806  |                                                                    | 0.674 |
| NM_017249 | Mbc2; membrane bound C2 domain containing protein                  | 0.674 |
| AI548924  |                                                                    | 0.673 |
| NM_031975 | Ptms; parathymosin                                                 | 0.672 |
| CB545884  |                                                                    | 0.671 |
| NM_022209 | Pppr2b2; protein phosphatase 2 (formerly 2A), regulatory subunit 2 | 0.671 |
| BF562144  |                                                                    | 0.671 |
| AA901299  |                                                                    | 0.671 |
| CB546135  | LOC311592; similar to CG18214-PA                                   | 0.670 |
| NM_017223 | Slc20a2; solute carrier family 20, member 2                        | 0.669 |
| NM_130746 | Slc5a6; solute carrier family 5, member 6                          | 0.669 |
