# Supplementary material for: Hepatic Gene Expression Changes throughout the Day in the Fischer Rat: Implications for Toxicogenomic Experiments
Source: Oxford University Press journal article supplement (doi:10.1093/toxsci/kfi166), 2005-04-06
Supplement: kfi166_Supplementary_Data.zip [file kfi166_Supplementary_Data.zip › kfi16612hrOffsetGenes.pdf]

| Accession | NAME                                                         | Log Mean Fold Change<br>(Night / Light) |
|-----------|--------------------------------------------------------------|-----------------------------------------|
| NM_017332 | Fasn; fatty acid synthase                                    | 5.864                                   |
| BF548067  |                                                              | 4.844                                   |
| BQ195908  |                                                              | 4.513                                   |
| AI175258  |                                                              | 4.347                                   |
| NM_134383 | rELO2; fatty acid elongase 2                                 | 3.876                                   |
| NM_012565 | Gck; glucokinase                                             | 3.850                                   |
| BQ203637  | LOC300786; similar to ClpX protein                           | 3.417                                   |
| NM_017206 | Slc6a6; solute carrier family 6, member 6                    | 3.219                                   |
| BF283409  | Cldn1; claudin 1                                             | 3.187                                   |
| NM_134372 | Acmsd; 2-amino-3-carboxymuconate-6-semialdehyde decarboxylas | 3.168                                   |
| AI059216  | LOC365352; similar to flavoprotein oxidoreductase MICAL2     | 3.149                                   |
| NM_019286 | Adh1; alcohol dehydrogenase 1                                | 3.130                                   |
| NM_016987 | Acly; ATP citrate lyase                                      | 2.951                                   |
| AW533663  | LOC287950; similar to proline dehydrogenase; PRODH           | 2.945                                   |
| NM_031678 | Per2; period homolog 2                                       | 2.938                                   |
| BE095833  | LOC360983; similar to RIKEN cDNA 1110067D22                  | 2.919                                   |
| BU760148  |                                                              | 2.881                                   |
| CB546197  | LOC305816; similar to RIKEN cDNA 4921528E07                  | 2.875                                   |
| AI411523  | Acmsd; 2-amino-3-carboxymuconate-6-semialdehyde decarboxylas | 2.830                                   |
| BF419646  |                                                              | 2.811                                   |
| NM_017274 | Gpm; glycerol-3-phosphate acyltransferase, mitochondrial     | 2.766                                   |
| AI070799  |                                                              | 2.722                                   |
| BQ199604  |                                                              | 2.715                                   |
| BF544951  |                                                              | 2.677                                   |
| NM_013043 | Tgfb1i4; transforming growth factor beta 1 induced transcrip | 2.645                                   |
| AI548924  |                                                              | 2.633                                   |
| BQ201936  |                                                              | 2.626                                   |
| CB546373  | LOC303024; similar to F-box and WD-40 domain protein 1B      | 2.607                                   |
| NM_053019 | Avpr1a; arginine vasopressin receptor 1A                     | 2.562                                   |
| M30596    | Me1; malic enzyme 1                                          | 2.550                                   |
| BF558075  | LOC315702; similar to DKFZP434H132 protein                   | 2.543                                   |
| BI274533  | LOC363016; similar to RIKEN cDNA 4931406C07                  | 2.518                                   |
| AI237597  |                                                              | 2.518                                   |
| AA819072  |                                                              | 2.492                                   |
| BQ204380  | LOC310645; similar to RIKEN cDNA 1110011E12                  | 2.486                                   |
| AA924783  |                                                              | 2.480                                   |
| AW521621  |                                                              | 2.454                                   |
| AB072252  |                                                              | 2.448                                   |
| AI059241  |                                                              | 2.403                                   |
| NM_017127 | Chk; choline kinase                                          | 2.371                                   |
| NM_053727 | Nfil3; nuclear factor, interleukin 3, regulated              | 2.352                                   |
| AI072958  |                                                              | 2.339                                   |
| AA818627  | Insig2; insulin induced gene 2                               | 2.327                                   |
| NM_023104 | LOC65984; acetoacetyl-CoA synthetase                         | 2.327                                   |
| BG375381  |                                                              | 2.314                                   |
| BF411285  | LOC309173; similar to expressed sequence AW491445            | 2.295                                   |
| CB546823  | LOC360887; similar to Cabcl1 protein                         | 2.288                                   |
| BQ209232  | LOC288444; similar to heat shock protein 105 kDa alpha       | 2.276                                   |
| NM_017064 | Stat5a; signal transducer and activator of transcription 5A  | 2.269                                   |
| NM_013157 | Ass; arginosuccinate synthetase                              | 2.263                                   |

|           |                                                              |       |
|-----------|--------------------------------------------------------------|-------|
| AA866303  |                                                              | 2.250 |
| M58040    | Tfrc; transferrin receptor                                   | 2.250 |
| BQ211559  |                                                              | 2.231 |
| BE109730  |                                                              | 2.218 |
| NM_145878 | Fabp5; fatty acid binding protein 5, epidermal               | 2.218 |
| AI235600  |                                                              | 2.212 |
| BF284887  |                                                              | 2.174 |
| NM_017258 | Btg1; B-cell translocation gene 1                            | 2.154 |
| NM_032074 | Irs3; insulin receptor substrate 3                           | 2.148 |
| NM_031699 | Cldn1; claudin 1                                             | 2.129 |
| AI070121  |                                                              | 2.129 |
| AA818254  | LOC361843; similar to apoptosis-inducing factor (AIF)-homolo | 2.123 |
| AA800948  | LOC316531; similar to Tubulin alpha-4 chain (Alpha-tubulin 4 | 2.123 |
| BI290768  | rELO2; fatty acid elongase 2                                 | 2.123 |
| NM_031776 | Gda; guanine deaminase                                       | 2.123 |
| BI278309  | LOC360887; similar to Cabcl1 protein                         | 2.123 |
| NM_013098 | G6pc; glucose-6-phosphatase, catalytic                       | 2.103 |
| NM_173322 | Prol2; proline rich 2                                        | 2.059 |
| BQ202892  | Notch2; notch gene homolog 2, (Drosophila)                   | 2.052 |
| BM389833  | LOC308589; similar to Sphingosine kinase 2 (SK 2) (SPK 2)    | 2.052 |
| AA891693  | LOC314214; similar to RIKEN cDNA 2810055F11                  | 2.033 |
| AY090783  | Pdgfrb; platelet derived growth factor receptor, beta polype | 2.033 |
| AW526099  |                                                              | 1.995 |
| BQ200688  |                                                              | 1.995 |
| NM_022392 | Insig1; insulin induced gene 1                               | 1.976 |
| NM_138504 | OkI38; pregnancy-induced growth inhibitor                    | 1.970 |
| NM_019314 | Kcnn2; potassium intermediate/small conductance calcium-acti | 1.947 |
| BF392884  |                                                              | 1.938 |
| AB012600  | Arntl; aryl hydrocarbon receptor nuclear translocator-like   | 1.931 |
| BE106199  | LOC300807; similar to nuclear orphan receptor/transcription  | 1.925 |
| AA924580  |                                                              | 1.925 |
| BM384458  | LOC312777; similar to ets variant gene 6; TEL1 oncogene      | 1.919 |
| BF284120  | Efna1; ephrin A1                                             | 1.912 |
| BQ196242  |                                                              | 1.906 |
| CA507867  |                                                              | 1.900 |
| NM_022229 | Hsp60; heat shock protein 60 (liver)                         | 1.874 |
| 4731643   |                                                              | 1.874 |
| NM_013222 | Gfer; growth factor, erv1 -like                              | 1.861 |
| AI031053  |                                                              | 1.845 |
| NM_013060 | Id2; Inhibitor of DNA binding 2, dominant negative helix-loo | 1.829 |
| BE112940  |                                                              | 1.825 |
| NM_138502 | Mgll; monoglyceride lipase                                   | 1.810 |
| NM_019158 | Aqp8; aquaporin 8                                            | 1.747 |
| AW141633  | LOC301252; similar to heat shock protein 84 - mouse          | 1.740 |
| BF559096  |                                                              | 1.740 |
| NM_024399 | Aspa; aspartoacylase                                         | 1.734 |
| NM_017000 | Nqo1; NAD(P)H dehydrogenase, quinone 1                       | 1.727 |
| BU759320  | LOC302953; similar to KIAA1784 protein                       | 1.721 |
| AW435442  | Fkbp4; FK506 binding protein 4 (59 kDa)                      | 1.721 |
| AA859361  | LOC362454; similar to heme-binding protein                   | 1.715 |
| BQ208973  |                                                              | 1.696 |
| AA801331  |                                                              | 1.689 |

|           |                                                              |       |
|-----------|--------------------------------------------------------------|-------|
| AA942731  | LOC313278; similar to protein tyrosine phosphatase, receptor | 1.689 |
| CB544480  |                                                              | 1.676 |
| AA849497  | LOC311569; similar to Acetyl-coenzyme A synthetase, cytoplas | 1.676 |
| AI407815  | LOC294753; similar to Molybdenum cofactor synthesis protein  | 1.676 |
| BI276840  | LOC363537; similar to TBX1 protein                           | 1.651 |
| BF551228  | Mal2; mal, T-cell differentiation protein 2                  | 1.645 |
| AF020046  | Itgae; integrin alpha E1, epithelial-associated              | 1.625 |
| AI059056  |                                                              | 1.619 |
| CB548115  |                                                              | 1.619 |
| BQ209349  |                                                              | 1.619 |
| NM_053843 | Fcgr3; Fc receptor, IgG, low affinity III                    | 1.613 |
| AI137914  |                                                              | 1.606 |
| BG665153  | LOC289144; similar to calcyclin binding protein              | 1.606 |
| BI281823  | LOC306722; similar to Dapk1 protein                          | 1.606 |
| NM_053291 | Pgk1; phosphoglycerate kinase 1                              | 1.581 |
| AI412322  | LOC308100; similar to acetyl CoA transferase-like            | 1.581 |
| CB547054  | LOC315644; similar to b,b-carotene-9,10-dioxygenase          | 1.571 |
| AA925693  |                                                              | 1.568 |
| AW526333  | LOC300837; similar to senescence downregulated leo1-like     | 1.563 |
| BF552637  | Tnfrsf1b; tumor necrosis factor receptor superfamily, member | 1.555 |
| BF558976  |                                                              | 1.555 |
| BI295182  |                                                              | 1.553 |
| BF548045  |                                                              | 1.549 |
| BQ780001  |                                                              | 1.530 |
| CB545026  | ADRP; adipose differentiation-related protein                | 1.523 |
| CB545585  | LOC361815; similar to ring finger protein 8                  | 1.517 |
| NM_012966 | Hspe1; heat shock 10 kDa protein 1                           | 1.517 |
| AA818166  |                                                              | 1.511 |
| NM_057155 | Xpnpep2; X-prolyl aminopeptidase (aminopeptidase P) 2, membr | 1.504 |
| AW532611  |                                                              | 1.504 |
| NM_030992 | Plid1; phospholipase D1                                      | 1.498 |
| BF290788  |                                                              | 1.498 |
| NM_012895 | Adk; adenosine kinase                                        | 1.496 |
| BI290744  |                                                              | 1.492 |
| CB547603  | LOC300111; similar to Protein CGI-51                         | 1.485 |
| BQ210802  | Epim; epimorphin                                             | 1.485 |
| AI233777  |                                                              | 1.481 |
| NM_030996 | Oprs1; opioid receptor, sigma 1                              | 1.479 |
| NM_017081 | Hsd11b2; hydroxysteroid 11-beta dehydrogenase 2              | 1.472 |
| BE103471  |                                                              | 1.447 |
| AI599689  | LOC297388; similar to BoLA domain-containing protein like (1 | 1.428 |
| CB545097  | Spnb2; spectrin beta 2                                       | 1.424 |
| NM_022629 | Bbox1; butyrobetaine (gamma), 2-oxoglutarate dioxygenase 1 ( | 1.415 |
| BE106313  | LOC289392; similar to plexin 2                               | 1.409 |
| NM_031834 | Sult1a1; sulfotransferase family 1A, phenol-preferring, memb | 1.409 |
| BG664368  | LOC296488; similar to RIKEN cDNA 2810409H07                  | 1.407 |
| AI179206  |                                                              | 1.402 |
| AA943765  |                                                              | 1.402 |
| BF416954  | LOC361682; similar to tumor-suppressing subchromosomal trans | 1.396 |
| AA956059  |                                                              | 1.396 |
| BE111450  |                                                              | 1.396 |
| NM_033235 | Mdh1; malate dehydrogenase 1                                 | 1.396 |

|           |                                                              |       |
|-----------|--------------------------------------------------------------|-------|
| NM_173295 | Udpgtr2; liver UDP-glucuronosyltransferase, phenobarbital-in | 1.377 |
| BF558524  |                                                              | 1.364 |
| CA511014  | LOC361641; similar to RIKEN cDNA 3230401I01                  | 1.364 |
| NM_012630 | Prlr; prolactin receptor                                     | 1.358 |
| BF389173  |                                                              | 1.351 |
| BI285616  | ADRP; adipose differentiation-related protein                | 1.345 |
| NM_031039 | Gpt; glutamic-pyruvate transaminase (alanine aminotransferas | 1.345 |
| BQ193826  | Cdc91I1; CDC91 cell division cycle 91-like 1 (S. cerevisiae) | 1.345 |
| BF417274  | Cct5; chaperonin containing TCP1, subunit 5 (epsilon)        | 1.339 |
| BG371596  |                                                              | 1.332 |
| CB544473  | Mig12; MID1 interacting G12-like protein                     | 1.332 |
| BI282629  | Tkt; transketolase                                           | 1.332 |
| AI101243  | LOC365841; similar to CG5805-PA                              | 1.328 |
| CB606048  |                                                              | 1.326 |
| CA504421  |                                                              | 1.319 |
| AI713204  | Mgll; monoglyceride lipase                                   | 1.319 |
| BQ209793  | LOC290046; similar to Heterogeneous nuclear ribonucleoprotei | 1.319 |
| BF405011  | LOC310200; similar to RIKEN cDNA 0610012A05                  | 1.319 |
| AI176739  | LOC362894; similar to mKIAA1002 protein                      | 1.319 |
| NM_022510 | Rpl4; ribosomal protein L4                                   | 1.317 |
| NM_012903 | Anp32a; acidic nuclear phosphoprotein 32 family, member A    | 1.313 |
| NM_130403 | Ppp1r14a; protein phosphatase 1, regulatory (inhibitor) subu | 1.313 |
| NM_022521 | Oat; ornithine aminotransferase                              | 1.307 |
| BG378278  |                                                              | 1.307 |
| BF397678  |                                                              | 1.307 |
| NM_031062 | Mvd; mevalonate pyrophosphate decarboxylase                  | 1.300 |
| AA893764  |                                                              | 1.300 |
| NM_032066 | LOC84013; smooth muscle-specific 17 beta-hydroxysteroid dehy | 1.295 |
| AI177346  |                                                              | 1.281 |
| AA956338  |                                                              | 1.271 |
| BF557909  | LOC295394; similar to RIKEN cDNA 2410012M04                  | 1.268 |
| BQ194471  |                                                              | 1.262 |
| NM_133610 | Kcnh5; potassium voltage-gated channel, subfamily H (eag-rel | 1.262 |
| CA338495  | LOC362890; similar to RIKEN cDNA 2700085A14                  | 1.256 |
| BM388613  | LOC315760; hypothetical LOC315760                            | 1.256 |
| AI044796  |                                                              | 1.254 |
| NM_053607 | Facl5; fatty acid Coenzyme A ligase, long chain 5            | 1.249 |
| NM_017033 | Pgm1; phosphoglucomutase 1                                   | 1.244 |
| AI105113  |                                                              | 1.243 |
| AA848350  | LOC362303; similar to SBBI26 homolog                         | 1.239 |
| NM_022950 | C1galt1; core1 UDP-galactose:N-acetylgalactosamine-alpha-R b | 1.237 |
| 293396_Rn |                                                              | 1.237 |
| AI412958  | Pp; pyrophosphatase                                          | 1.230 |
| BM390643  |                                                              | 1.230 |
| AI169490  |                                                              | 1.230 |
| BQ195671  |                                                              | 1.224 |
| BG672413  | LOC366602; similar to RIKEN cDNA 1100001I23                  | 1.223 |
| AA893454  |                                                              | 1.205 |
| BE108866  |                                                              | 1.205 |
| AI233748  |                                                              | 1.198 |
| AI072420  |                                                              | 1.195 |
| AW916914  |                                                              | 1.192 |

|           |                                                              |       |
|-----------|--------------------------------------------------------------|-------|
| BF555408  | Fga; fibrinogen, alpha polypeptide                           | 1.188 |
| BE104095  |                                                              | 1.186 |
| BQ196489  |                                                              | 1.179 |
| BI275276  | LOC295394; similar to RIKEN cDNA 2410012M04                  | 1.177 |
| NM_017052 | Sord; sorbitol dehydrogenase                                 | 1.167 |
| AA859341  | LOC309460; similar to Fish protein                           | 1.166 |
| CB544468  |                                                              | 1.166 |
| NM_139090 | Alk7; activin receptor-like kinase 7                         | 1.154 |
| AI045864  |                                                              | 1.154 |
| AI100775  | Ykt6; prenylated SNARE protein                               | 1.154 |
| X59290    | LOC60589; eph and elk-related kinase                         | 1.154 |
| NM_031664 | Slc28a2; solute carrier family 28, member 2                  | 1.141 |
| BQ202073  |                                                              | 1.141 |
| BQ194054  | LOC287562; similar to small inducible cytokine A12 precursor | 1.141 |
| CB546018  |                                                              | 1.141 |
| CA513389  |                                                              | 1.141 |
| NM_032071 | Synj2; synaptojanin 2                                        | 1.141 |
| CB548052  | LOC296925; similar to aminoadipate-semialdehyde synthase     | 1.135 |
| NM_017008 | Gapd; glyceraldehyde-3-phosphate dehydrogenase               | 1.128 |
| NM_031840 | Fdps; farnesyl diphosphate synthase                          | 1.126 |
| AA926048  | LOC298250; similar to hypothetical protein FLJ10986          | 1.122 |
| BE103138  | LOC360719; similar to homogentisate 1, 2-dioxygenase         | 1.122 |
| NM_022592 | Tkt; transketolase                                           | 1.122 |
| BF521811  | Sez6; seizure related gene 6                                 | 1.122 |
| BF282900  |                                                              | 1.122 |
| AA956212  |                                                              | 1.115 |
| BF282682  | LOC293103; similar to RIKEN cDNA 0610007P06                  | 1.109 |
| AA962978  | LOC361154; similar to cDNA sequence BC035537                 | 1.109 |
| BQ782861  |                                                              | 1.096 |
| AI103101  | LOC292787; similar to RIKEN cDNA 1810054G18                  | 1.090 |
| BG672480  | LOC287280; similar to S-phase kinase-associated protein 1A i | 1.090 |
| BE109064  |                                                              | 1.077 |
| BQ209985  |                                                              | 1.077 |
| BF552313  | Entpd5; ectonucleoside triphosphate diphosphohydrolase 5     | 1.077 |
| BF397984  |                                                              | 1.077 |
| NM_012973 | Kcne1; potassium voltage-gated channel, Isk-related subfamil | 1.064 |
| NM_017255 | P2ry2; purinergic receptor P2Y, G-protein coupled 2          | 1.058 |
| BF403819  |                                                              | 1.058 |
| CB548086  |                                                              | 1.055 |
| NM_031509 | Gsta1; glutathione S-transferase, alpha 1                    | 1.052 |
| NM_145774 | Rab38; Rab38, member of RAS oncogene family                  | 1.052 |
| AW917747  |                                                              | 1.048 |
| NM_017235 | Hsd17b7; hydroxysteroid dehydrogenase 17 beta, type 7        | 1.041 |
| NM_145782 | Cyp3a18; cytochrome P450, 3a18                               | 1.039 |
| CB606126  | LOC360887; similar to Cabcl1 protein                         | 1.039 |
| NM_138877 | Dia1; diaphorase 1                                           | 1.037 |
| AI232088  |                                                              | 1.033 |
| AI409493  |                                                              | 1.032 |
| AW141655  | LOC288719; similar to tyrosylprotein sulfotransferase-2; TPS | 1.027 |
| NM_053605 | Smpd3; sphingomyelin phosphodiesterase 3, neutral            | 1.026 |
| BQ201671  |                                                              | 1.026 |
| AA819653  | LOC291135; similar to thioesterase superfamily member 2      | 1.021 |

|           |                                                                |       |
|-----------|----------------------------------------------------------------|-------|
| AA818774  |                                                                | 1.020 |
| BQ203540  |                                                                | 1.020 |
| BM391984  | LOC291137; similar to geminin                                  | 1.020 |
| NM_175707 | Ppil3; peptidylprolyl isomerase (cyclophilin)-like 3           | 1.017 |
| CB545207  | LOC360709; similar to Trk-fused gene                           | 1.014 |
| CB545969  | LOC315963; similar to RIKEN cDNA 1300017J02                    | 1.014 |
| NM_019370 | LOC54410; alkaline phosphodiesterase                           | 1.013 |
| AI137931  |                                                                | 1.007 |
| NM_138904 | Ga; liver mitochondrial glutaminase                            | 1.007 |
| NM_017172 | Zfp361l; zinc finger protein 36, C3H type-like 1               | 1.007 |
| BU671525  | Bmp1; bone morphogenetic protein 1 (procollagen C-proteinase   | 1.004 |
| NM_017233 | Hpd; 4-hydroxyphenylpyruvic acid dioxygenase                   | 0.999 |
| NM_138911 | Stip1; stress-induced-phosphoprotein 1 (Hsp70/Hsp90-organizi   | 0.998 |
| NM_053698 | Cited2; Cbp/p300-interacting transactivator, with Glu/Asp-ri   | 0.996 |
| CB548137  | LOC365865; similar to phosphatidylinositol-4-phosphate 5-kin   | 0.995 |
| AW525660  | LOC293587; similar to RIKEN cDNA 1810014F10 gene               | 0.994 |
| NM_030586 | omb5; cytochrome b5, outer mitochondrial membrane isoform      | 0.994 |
| NM_032076 | Ptger4; prostaglandin E receptor 4 (subtype EP4)               | 0.994 |
| NM_017259 | Btg2; B-cell translocation gene 2, anti-proliferative          | 0.990 |
| AI235349  |                                                                | 0.989 |
| NM_021744 | Cd14; CD14 antigen                                             | 0.988 |
| CB547807  | LOC310900; microsomal triglyceride transfer protein            | 0.982 |
| NM_139253 | Sdmsf; stem cell derived neuronal survival protein precursor   | 0.982 |
| AI029526  |                                                                | 0.975 |
| CB547994  | LOC294595; similar to KIAA0372 gene product                    | 0.973 |
| AA925274  | Prkar2a; protein kinase, cAMP-dependent, regulatory, type 2,   | 0.969 |
| NM_019377 | Ywhab; tyrosine 3-monooxygenase/tryptophan 5 monooxygenase act | 0.964 |
| S82820    |                                                                | 0.963 |
| BF412789  | Cit; citron                                                    | 0.963 |
| BF566700  | LOC308959; similar to KIAA1203 protein                         | 0.956 |
| NM_022389 | Dhcr7; 7-dehydrocholesterol reductase                          | 0.956 |
| AI599252  | LOC364837; similar to glycophorin C isoform 2                  | 0.956 |
| AA963282  |                                                                | 0.950 |
| AW140661  | LOC294016; similar to Cytosolic purine 5-nucleotidase (5-nuc   | 0.944 |
| AI029212  |                                                                | 0.943 |
| BF281109  |                                                                | 0.943 |
| NM_031777 | Usf1; upstream transcription factor 1                          | 0.943 |
| BF395818  |                                                                | 0.937 |
| BE128627  | LOC362434; similar to putative transmembrane protein PTG       | 0.937 |
| NM_012922 | Casp3; caspase 3                                               | 0.931 |
| AA892287  | LOC287805; similar to retinoic acid inducible protein 3        | 0.931 |
| AI012580  |                                                                | 0.926 |
| BF564382  | LOC309522; similar to RIKEN cDNA 3230401I01                    | 0.924 |
| CB547103  | LOC308129; similar to RIKEN cDNA 0610009A07                    | 0.924 |
| AA850781  | LOC316726; similar to peptidylprolyl isomerase D (cyclophili   | 0.918 |
| BF547960  | Rab14; GTPase Rab14                                            | 0.908 |
| BM422665  | CCRP; cytoplasmic CAR retention protein                        | 0.907 |
| NM_012608 | Mme; membrane metallo endopeptidase                            | 0.905 |
| BI275926  | Alcam; activated leukocyte cell adhesion molecule              | 0.905 |
| BM386916  |                                                                | 0.903 |
| NM_031049 | Lss; 2,3-oxidosqualene: lanosterol cyclase                     | 0.899 |
| NM_031839 | Cyp2c23; arachidonic acid epoxygenase                          | 0.899 |

|           |                                                              |       |
|-----------|--------------------------------------------------------------|-------|
| BI301193  | LOC288719; similar to tyrosylprotein sulfotransferase-2; TPS | 0.897 |
| BQ200234  |                                                              | 0.892 |
| NM_031561 |                                                              | 0.892 |
| BF543974  | LOC310672; similar to RIKEN cDNA 2610024N01                  | 0.890 |
| AI600156  |                                                              | 0.889 |
| AI070034  | LOC363796; similar to RIKEN cDNA 2400003L07                  | 0.886 |
| AI178025  | LOC316742; similar to TG interacting factor                  | 0.886 |
| BE128197  | LOC305240; similar to RNA-binding protein isoform G3BP-2a    | 0.882 |
| NM_053671 | Tmf1; TATA element modulatory factor 1                       | 0.880 |
| AI535436  | LOC305895; similar to RIKEN cDNA 0710008A13                  | 0.876 |
| CB547639  |                                                              | 0.876 |
| AI043711  |                                                              | 0.873 |
| BF548541  |                                                              | 0.873 |
| XM_220398 | LOC303113; similar to FLJ00195 protein                       | 0.873 |
| BF281520  | LOC296947; similar to Fascin 3                               | 0.873 |
| CB547859  |                                                              | 0.873 |
| AI575403  | LOC288620; similar to CCT (chaperonin containing TCP-1) zeta | 0.872 |
| BF416274  | Chc1l; chromosome condensation 1-like                        | 0.867 |
| NM_022501 | Crip2; cysteine-rich protein 2                               | 0.867 |
| CB545766  |                                                              | 0.861 |
| NM_080783 | Gale; galactose-4-epimerase, UDP                             | 0.861 |
| AI547683  |                                                              | 0.861 |
| NM_133606 | Ehhadh; enoyl-Coenzyme A, hydratase/3-hydroxyacyl Coenzyme A | 0.861 |
| BQ196438  | LOC311456; similar to McKusick-Kaufman syndrome protein; MKK | 0.854 |
| NM_017201 | Ahcy; S-adenosylhomocysteine hydrolase                       | 0.853 |
| CB544376  | LOC300050; similar to block of proliferation 1               | 0.848 |
| AW919226  | LOC288346; similar to Histone-lysine N-methyltransferase, H4 | 0.841 |
| AI409108  | LOC362335; similar to CG11943-PB                             | 0.841 |
| BG374689  |                                                              | 0.841 |
| NM_022617 | Mpeg1; macrophage expressed gene 1                           | 0.838 |
| AI175494  | LOC296488; similar to RIKEN cDNA 2810409H07                  | 0.838 |
| AI706777  | Rin3; Ras and Rab interactor 3                               | 0.836 |
| BQ196556  | LOC361274; similar to nudix (nucleoside diphosphate linked m | 0.835 |
| AW918003  | LOC306347; similar to ELL                                    | 0.830 |
| NM_031027 | Dpyd; dihydropyrimidine dehydrogenase                        | 0.829 |
| NM_138884 | Akr1d1; aldo-keto reductase family 1, member D1 (delta 4-3-k | 0.829 |
| BM385177  |                                                              | 0.829 |
| BF389843  | LOC304056; similar to zinc finger protein 295                | 0.829 |
| BF550914  | LOC303090; similar to LRG-47                                 | 0.829 |
| BF404294  | LOC303384; similar to matrix metalloproteinase-28 precursor  | 0.829 |
| CB547308  | LOC304601; similar to TTF-I interacting protein 5            | 0.816 |
| CB545919  |                                                              | 0.810 |
| U89745    | LOC207127; unknown protein                                   | 0.810 |
| AA955165  |                                                              | 0.810 |
| BF553131  | LOC294385; similar to Suppressor of var1, 3-like 1           | 0.809 |
| CA506204  |                                                              | 0.803 |
| AW914991  | LOC305895; similar to RIKEN cDNA 0710008A13                  | 0.803 |
| CB545035  |                                                              | 0.803 |
| AW525189  |                                                              | 0.794 |
| AI233718  |                                                              | 0.793 |
| CB547905  | LOC313200; similar to RIKEN cDNA 2610207I16                  | 0.792 |
| BQ191138  |                                                              | 0.790 |

|           |                                                              |       |
|-----------|--------------------------------------------------------------|-------|
| CB547061  | LOC292536; similar to PRP31                                  | 0.790 |
| BF282964  |                                                              | 0.790 |
| BQ199879  | Srr; serine racemase                                         | 0.790 |
| AI535415  | LOC316726; similar to peptidylprolyl isomerase D (cyclophili | 0.790 |
| BF284800  | LOC311661; similar to zinc finger protein 64; zinc finger pr | 0.790 |
| AI556905  |                                                              | 0.790 |
| NM_053703 | Map2k6; mitogen-activated protein kinase kinase 6            | 0.789 |
| AI412323  |                                                              | 0.789 |
| CB606303  |                                                              | 0.784 |
| BF398009  | LOC287053; hypothetical LOC287053                            | 0.778 |
| BE115526  |                                                              | 0.778 |
| BE103947  |                                                              | 0.778 |
| BI278837  | LOC305251; similar to Rassf6 protein                         | 0.778 |
| BQ203725  | Hprt; hypoxanthine guanine phosphoribosyl transferase        | 0.777 |
| S62516    |                                                              | 0.773 |
| AI535124  | LOC361693; similar to S-CaBP2                                | 0.771 |
| NM_053410 | Gnpat; acyl-CoA:dihydroxyacetonephosphate acyltransferase    | 0.771 |
| CB548432  | LOC289055; similar to coagulation factor XIII, beta subunit  | 0.771 |
| NM_012732 | Lipa; lipase A, lysosomal acid                               | 0.765 |
| BG377273  |                                                              | 0.762 |
| AA924133  |                                                              | 0.759 |
| CB547227  | LOC361258; similar to Cul2 protein                           | 0.754 |
| BQ190162  |                                                              | 0.752 |
| CB545981  |                                                              | 0.749 |
| NM_017126 | Fdx1; ferredoxin 1                                           | 0.747 |
| BU759568  |                                                              | 0.746 |
| BI299334  | LOC297725; similar to Transmembrane 7 superfamily protein me | 0.746 |
| AW143689  | LOC363118; similar to RIKEN cDNA 4933408N02                  | 0.746 |
| AW918024  |                                                              | 0.746 |
| BM390860  |                                                              | 0.740 |
| NM_053439 | Ran; RAN, member RAS oncogene family                         | 0.738 |
| NM_053290 | Pgam1; phosphoglycerate mutase 1                             | 0.738 |
| NM_022298 | Tuba1; alpha-tubulin                                         | 0.733 |
| AI599232  |                                                              | 0.733 |
| NM_031812 | Cd164; CD164 antigen                                         | 0.727 |
| NM_017159 | Hal; histidine ammonia lyase                                 | 0.720 |
| CB547330  | LOC360709; similar to Trk-fused gene                         | 0.720 |
| AA892763  | LOC316101; similar to LIM domains containing protein 1       | 0.720 |
| CB606387  |                                                              | 0.714 |
| AA926087  |                                                              | 0.708 |
| AA859983  | LOC363216; similar to KIAA1592 protein                       | 0.708 |
| NM_022638 | Trpc2; transient receptor potential cation channel, subfamil | 0.708 |
| BI286625  |                                                              | 0.707 |
| CB548150  |                                                              | 0.707 |
| AW921193  |                                                              | 0.701 |
| BF407755  | LOC362446; similar to osteoclast inhibitory lectin           | 0.701 |
| NM_012883 | Ste; sulfotransferase, estrogen preferring                   | 0.701 |
| BI283952  | Gnpat; acyl-CoA:dihydroxyacetonephosphate acyltransferase    | 0.701 |
| BF561497  | LOC312320; similar to igf2 mRNA-binding protein 3            | 0.700 |
| NM_171990 | Bpnt1; 3(2),5-bisphosphate nucleotidase                      | 0.695 |
| AI599332  | Dag1; dystroglycan 1                                         | 0.695 |
| AI177104  | LOC298786; similar to solute carrier family 30 (zinc transpo | 0.695 |

|           |                                                                |       |
|-----------|----------------------------------------------------------------|-------|
| BE117922  | LOC361295; similar to SYT                                      | 0.689 |
| NM_053598 | Nudt4; diphosphoinositol polyphosphate phosphohydrolase type   | 0.684 |
| BQ201357  | LOC305021; similar to RIKEN cDNA C330023F11                    | 0.682 |
| AA925059  | Cyp51; cytochrome P450, subfamily 51                           | 0.681 |
| CB547604  |                                                                | 0.677 |
| BE111702  |                                                                | 0.676 |
| NM_030829 | Gprk5; G protein-coupled receptor kinase 5                     | 0.676 |
| CB544298  |                                                                | 0.673 |
| CB547253  | LOC316457; similar to FYVE finger-containing phosphoinositid   | 0.669 |
| BG376626  | LOC308758; similar to RIKEN cDNA 1110033O09                    | 0.669 |
| CB547613  |                                                                | 0.669 |
| BF556330  |                                                                | 0.663 |
| CA513423  | LOC362173; similar to membrane component, chromosome 11, sur   | 0.662 |
| NM_053971 | Rpl6; ribosomal protein L6                                     | 0.657 |
| BF282804  | LOC289453; similar to ATP-binding cassette, subfamily G, mem   | 0.657 |
| NM_019376 | Ywhag; tyrosine 3-monooxygenase/tryptophan 5-monooxygenase act | 0.653 |
| BG372544  | LOC309918; similar to RNA polymerase II elongation factor EL   | 0.653 |
| AW251358  | Lamc1; laminin, gamma 1                                        | 0.653 |
| BF412992  | LOC365387; similar to shippo 1                                 | 0.652 |
| AI233144  | Cald1; caldesmon 1                                             | 0.648 |
| NM_022922 | Tpi1; triosephosphate isomerase 1                              | 0.646 |
| AA817782  |                                                                | 0.639 |
| CB547001  | F5; coagulation factor 5                                       | 0.637 |
| NM_031706 | Rps8; ribosomal protein S8                                     | 0.636 |
| CB545847  | G3bp; Ras-GTPase-activating protein SH3-domain binding prote   | 0.625 |
| BF395151  | LOC295923; similar to NADH-ubiquinone oxidoreductase 30 kDa    | 0.623 |
| BM390554  | LOC361863; similar to lactation elevated 1                     | 0.619 |
| CB544579  | HRPAP20; hormone-regulated proliferation-associated 20 kDa p   | 0.618 |
| CA505434  | LOC363241; similar to eukaryotic translation elongation fact   | 0.618 |
| BF288617  |                                                                | 0.618 |
| AA925056  |                                                                | 0.614 |
| NM_053979 | Arl5; ADP-ribosylation factor-like 5                           | 0.613 |
| CB548387  |                                                                | 0.613 |
| AI716697  | LOC363706; similar to 5(3)-deoxyribonucleotidase               | 0.606 |
| CB545488  |                                                                | 0.606 |
| BI294760  | LOC290686; similar to RIKEN cDNA 1810029B16                    | 0.602 |
| D10655    | Dlat; dihydrolipoamide acetyltransferase                       | 0.601 |
| AI412231  |                                                                | 0.599 |
| NM_031528 | Rara; retinoic acid receptor, alpha                            | 0.594 |
| BE106746  | Pnmt; phenylethanolamine-N-methyltransferase                   | 0.593 |
| CB547065  | LOC361240; similar to RIKEN cDNA 2010012D11                    | 0.589 |
| BF558563  | LOC362697; similar to smooth muscle myosin heavy chain 11 is   | 0.586 |
| AI229840  | LOC295443; similar to ATP sulfurylase/APS kinase               | 0.586 |
| NM_053442 | Slc7a8; solute carrier family 7 (cationic amino acid transpo   | 0.581 |
| BM386178  | LOC366624; similar to cofilin                                  | 0.580 |
| NM_145098 | Nrp; neuropilin                                                | 0.580 |
| NM_053747 | Ubqln1; ubiquilin 1                                            | 0.580 |
| X05700    |                                                                | 0.580 |
| NM_019259 | C1qbp; complement component 1, q subcomponent binding protei   | 0.576 |
| NM_017365 | Pdlim1; PDZ and LIM domain 1                                   | 0.574 |
| CB546702  | LOC366214; similar to homeodomain protein                      | 0.567 |
| CA340886  | LOC305348; similar to lipoic acid synthetase                   | 0.567 |

|           |                                                              |        |
|-----------|--------------------------------------------------------------|--------|
| NM_031979 | Csda; cold shock domain protein A                            | 0.567  |
| BQ199863  | Utrn; utrophin                                               | 0.564  |
| CB605662  | LOC362751; similar to Txndc1 protein                         | 0.561  |
| NM_022540 | Prdx3; peroxiredoxin 3                                       | 0.557  |
| NM_130894 | Mfn2; mitofusin 2                                            | 0.556  |
| AF120111  | Fez2; fasciculation and elongation protein zeta 2 (zygin II) | 0.548  |
| CB545731  | Pepd; peptidase D                                            | 0.547  |
| CB546716  | LOC361300; similar to molybdenum cofactor sulfurase          | 0.535  |
| CB545364  | LOC288236; similar to leucine rich protein                   | 0.535  |
| NM_031127 | Suox; sulfite oxidase                                        | 0.529  |
| BQ211425  | LOC300799; similar to death-associated kinase 2              | 0.527  |
| NM_019185 | Gata6; GATA binding protein 6                                | 0.523  |
| NM_017160 | Rps6; ribosomal protein S6                                   | 0.516  |
| BF544669  | LOC295248; similar to Zfp67 protein                          | 0.512  |
| BI278567  |                                                              | 0.502  |
| AB020615  | Pkcl; protein kinase C, lambda                               | 0.501  |
| CB545385  |                                                              | 0.499  |
| NM_022402 | Arbp; acidic ribosomal protein P0                            | 0.498  |
| BE120171  | LOC304580; similar to slingshot 1                            | 0.497  |
| BQ199786  | LOC361693; similar to S-CaBP2                                | 0.491  |
| BF395191  |                                                              | 0.478  |
| BM389685  | LOC304020; similar to downregulated in ovarian cancer 1      | 0.475  |
| BI291651  |                                                              | 0.473  |
| CB548277  | LOC361348; similar to B29 protein                            | 0.472  |
| NM_030985 | Agtr1a; angiotensin II receptor, type 1 (AT1A)               | 0.465  |
| BF401812  | LOC305457; similar to leucine zipper-EF-hand containing tran | 0.464  |
| NM_134459 | Mic2l1; MIC2 like 1                                          | 0.462  |
| AA964911  |                                                              | 0.453  |
| AY028418  | Ntn3; Netrin 3                                               | 0.447  |
| CA339050  | LOC295238; similar to death associated protein 3             | 0.439  |
| BU670829  | LOC313196; similar to KIAA0368                               | 0.433  |
| BE107211  |                                                              | 0.414  |
| AJ458940  | znT3; solute carrier family 30 protein                       | 0.408  |
| AI111671  | LOC362136; LOC362136                                         | 0.387  |
| U12529    | LOC362751; similar to Txndc1 protein                         | 0.386  |
| BQ200733  | LOC304543; similar to Hypothetical protein KIAA0152          | 0.348  |
| NM_012562 | Fuca; fucosidase, alpha-L- 1, tissue                         | -0.312 |
| BF558005  | LOC363032; similar to PAP-1                                  | -0.352 |
| NM_053590 | Psmb1; proteasome (prosome, macropain) subunit, beta type 1  | -0.369 |
| BI286377  | LOC361407; similar to Component of oligomeric golgi complex  | -0.384 |
| AA892421  | LOC309399; similar to Cgi67 serine protease precursor        | -0.389 |
| BF556820  | Cblb; Cas-Br-M (murine) ectropic retroviral transforming seq | -0.408 |
| BM384263  | LOC302661; similar to Ofd1 protein                           | -0.408 |
| AI639017  |                                                              | -0.427 |
| BQ190716  | LOC317322; similar to glypican 4                             | -0.427 |
| NM_053681 | S100a3; S100 calcium binding protein A3                      | -0.440 |
| BF414004  | LOC291737; similar to RIKEN cDNA D030070L09                  | -0.446 |
| BF557108  | LOC360697; similar to interferon gamma receptor 2            | -0.465 |
| NM_019350 | Syt5; synaptotagmin 5                                        | -0.484 |
| BF419240  | LOC361648; similar to spinster-like protein                  | -0.492 |
| NM_031621 | Lnk; linker of T-cell receptor pathways                      | -0.510 |
| AI235939  | LOC309763; similar to DKFZP586B0923 protein                  | -0.510 |

|           |                                                              |        |
|-----------|--------------------------------------------------------------|--------|
| NM_022634 | Lst1; leucocyte specific transcript 1                        | -0.510 |
| AA818866  | LOC301427; similar to NADH dehydrogenase (ubiquinone) 1 beta | -0.516 |
| BG372003  | LOC306417; putative scaffolding protein POSH                 | -0.516 |
| BF282712  |                                                              | -0.518 |
| BF398657  | LOC296855; similar to Calcium-binding mitochondrial carrier  | -0.522 |
| M20629    | Es2; esterase 2                                              | -0.527 |
| AW523630  | LOC364151; similar to chromosome 4 open reading frame 1; exp | -0.529 |
| AI231074  |                                                              | -0.529 |
| NM_053850 | Blvra; biliverdin reductase A                                | -0.529 |
| BM389786  |                                                              | -0.533 |
| NM_133317 | Tob1; transducer of ERBB2, 1                                 | -0.535 |
| AI706196  | LOC292777; similar to cytoskeleton-associated protein 1      | -0.535 |
| BG670434  |                                                              | -0.542 |
| BQ194588  | LOC292737; similar to biliverdin reductase B (flavin reducta | -0.548 |
| AA943847  | LOC366468; similar to U7 snRNP-specific Sm-like protein LSM1 | -0.562 |
| AI071000  |                                                              | -0.567 |
| BE329208  | LOC301024; similar to SREBP cleavage activating protein      | -0.567 |
| BQ205409  | LOC311846; similar to Leucine-rich repeat-containing 8       | -0.567 |
| BQ204799  | LOC293677; similar to mutant p53 binding protein 1           | -0.574 |
| NM_053340 | Ogfr; opioid growth factor receptor                          | -0.574 |
| AI044063  |                                                              | -0.586 |
| BF555897  | Cklfsf8; chemokine-like factor super family 8                | -0.586 |
| BE110770  |                                                              | -0.586 |
| BU758972  |                                                              | -0.586 |
| BQ209143  |                                                              | -0.586 |
| BE106598  |                                                              | -0.586 |
| NM_053948 | Polr2g; polymerase (RNA) II (DNA directed)polypeptide G      | -0.590 |
| AI059929  |                                                              | -0.593 |
| AI136130  |                                                              | -0.599 |
| BE111806  |                                                              | -0.599 |
| AW921539  | LOC299198; similar to CGI-35 protein                         | -0.604 |
| BE109570  | LOC315707; similar to Tyrosine-protein kinase CSK (C-SRC kin | -0.606 |
| AI112155  | LOC362007; similar to RIKEN cDNA 5730470L24                  | -0.610 |
| AA894259  | LOC290999; similar to RIKEN cDNA 2010110M21                  | -0.612 |
| NM_057125 | Pex6; peroxisomal biogenesis factor 6                        | -0.612 |
| NM_022588 | Mta1; metastasis associated 1                                | -0.612 |
| NM_019373 | Apom; apolipoprotein M                                       | -0.615 |
| AI029178  |                                                              | -0.618 |
| AA893659  | LOC362778; similar to RIKEN cDNA 4933433P14 gene             | -0.618 |
| BI294361  |                                                              | -0.618 |
| BQ190250  |                                                              | -0.618 |
| CA512738  | LOC362865; similar to KIAA1208 protein                       | -0.618 |
| BF550923  |                                                              | -0.618 |
| BQ202162  |                                                              | -0.631 |
| AW253256  |                                                              | -0.631 |
| BQ194182  | LOC304010; similar to zinc finger protein ZNF-U69274         | -0.631 |
| NM_031640 | Pgcp; plasma glutamate carboxypeptidase                      | -0.637 |
| BQ206565  | LOC317241; similar to ring finger protein 12                 | -0.637 |
| AI112987  | LOC292071; similar to CDT1 protein                           | -0.637 |
| AI408045  | Prim2; DNA primase, p58 subunit                              | -0.646 |
| NM_031136 | Tmsb4x; thymosin beta-4                                      | -0.650 |
| NM_019301 | Crry; complement receptor related protein                    | -0.650 |

|           |                                                              |        |
|-----------|--------------------------------------------------------------|--------|
| BF403205  | LOC363137; similar to 101F6 protein                          | -0.653 |
| BI285307  |                                                              | -0.657 |
| NM_138892 | Rs21c6; RS21-C6 protein                                      | -0.657 |
| BG377140  | LOC367170; similar to 3-5 exonuclease TREX1                  | -0.657 |
| BF522868  | LOC287475; similar to CGI-125 protein                        | -0.661 |
| AA848547  | LOC360554; similar to RIKEN cDNA 5730408C10                  | -0.668 |
| AW251852  |                                                              | -0.668 |
| BI290714  |                                                              | -0.669 |
| BE102384  | LOC303637; similar to ATP-binding cassette transporter sub-f | -0.669 |
| BE099594  | LOC297705; similar to B230313N05Rik protein                  | -0.669 |
| AA875092  | Itga7; integrin alpha 7                                      | -0.669 |
| NM_173328 | Gpr48; G protein-coupled receptor 48                         | -0.670 |
| BF284803  | LOC293624; similar to interferon regulatory factor 7         | -0.672 |
| NM_133320 | Nudel; LIS1-interacting protein NUDEL; endooligopeptidase A  | -0.676 |
| NM_173304 | Cyp2d5; cytochrome P450CMF1b                                 | -0.682 |
| AI008698  | LOC299905; similar to TRAP/Mediator complex component TRAP25 | -0.682 |
| BI285246  | Fut4; alpha 1,3-fucosyltransferase Fuc-T (similar to mouse F | -0.682 |
| BM387283  |                                                              | -0.688 |
| BM388124  | LOC361842; similar to SAR1a gene homolog                     | -0.688 |
| AI408613  | LOC290215; similar to gamma2-adaptin                         | -0.694 |
| AI233429  | LOC362998; similar to RIKEN cDNA 2810451A06                  | -0.695 |
| NM_012489 | Acaa1; acetyl-Coenzyme A acyltransferase 1 (peroxisomal 3-ox | -0.708 |
| NM_053911 | Pscd2; pleckstrin homology, Sec7 and coiled/coil domains 2   | -0.708 |
| AI227674  | LOC287703; similar to Protein translation factor SUI1 homolo | -0.709 |
| AA818404  | LOC298384; similar to RIKEN cDNA 0610037L13                  | -0.720 |
| CA945782  |                                                              | -0.720 |
| NM_130746 | Slc5a6; solute carrier family 5, member 6                    | -0.727 |
| BG379990  |                                                              | -0.727 |
| NM_134400 | Dnttip1; deoxynucleotidyltransferase, terminal, interacting  | -0.727 |
| CB547525  | LOC287644; similar to phosphatase, orphan 1                  | -0.727 |
| BM387365  | LOC298097; similar to RIKEN cDNA 2810435D12                  | -0.733 |
| AI178104  | LOC293623; similar to RIKEN cDNA 2400009B11 gene             | -0.733 |
| AI007753  |                                                              | -0.738 |
| NM_012838 | Cstb; cystatin B                                             | -0.739 |
| NM_172033 | Evt1; evectin-1                                              | -0.739 |
| BQ201147  | LOC311800; similar to hypothetical protein MGC14327          | -0.739 |
| BI275963  | Ga; liver mitochondrial glutaminase                          | -0.743 |
| BQ202107  | LOC311203; similar to peroxisome biogenesis factor 16        | -0.746 |
| BI288557  | LOC308993; similar to Selenide,water dikinase 2 (Selenophosp | -0.747 |
| BQ208559  | LOC289046; similar to transmembrane protein 9                | -0.752 |
| BM389752  |                                                              | -0.752 |
| BM392091  |                                                              | -0.752 |
| NM_139252 | Ppap2c; phosphatidic acid phosphatase type 2c                | -0.754 |
| NM_012512 | B2m; beta-2 microglobulin                                    | -0.759 |
| CB548298  | LOC287607; similar to FYVE zinc finger phosphatase           | -0.759 |
| CA505486  | LOC288455; similar to chromosome 13 open reading frame 12    | -0.759 |
| Z83023    | LOC287076; similar to zinc finger protein 263; kruppel-assoc | -0.764 |
| BQ781323  | LOC310192; similar to Triple functional domain protein (PTPR | -0.765 |
| AI411541  | Ptger3; prostaglandin E receptor 3                           | -0.765 |
| BF543500  | LOC290408; similar to RIKEN cDNA 2410174K12                  | -0.769 |
| BE111474  |                                                              | -0.771 |
| BQ202832  | LOC313052; similar to protein 4.1, P4.1 - mouse              | -0.771 |

|                |                                                              |        |
|----------------|--------------------------------------------------------------|--------|
| NM_133591      | Rph3al; rabphilin 3A-like (without C2 domains)               | -0.771 |
| BF284840       |                                                              | -0.778 |
| BM385355       | LOC360478; LOC360478                                         | -0.778 |
| BE098799       |                                                              | -0.784 |
| BE116091       | LOC313203; similar to without children CG5965-PA             | -0.790 |
| BG374235       | Ca125; ovarian carcinoma antigen CA125                       | -0.796 |
| NM_053345      | Gtf2a2; general transcription factor Ila, 2 (12kD subunit)   | -0.797 |
| BF284148       | LOC303397; similar to breast carcinoma amplified sequence 3; | -0.801 |
| AI102437       | LOC292803; similar to hypothetical protein MGC13096          | -0.803 |
| AA963670       | LOC306630; similar to 1110065L07Rik protein                  | -0.803 |
| NM_053857      | Eif4ebp1; eukaryotic translation initiation factor 4E bindin | -0.810 |
| AW523679       | LOC363133; similar to poly(rC) binding protein 4             | -0.810 |
| BE096374       | LOC297453; similar to hypothetical protein MGC27683          | -0.810 |
| BE109513       |                                                              | -0.810 |
| BG379703       | LOC297415; similar to RIKEN cDNA 2010309E21                  | -0.810 |
| AI030835       |                                                              | -0.816 |
| BI289879       | LOC308992; similar to RIKEN cDNA G630024C07 gene             | -0.816 |
| BE120794       | LOC291444; similar to RIKEN cDNA 3110038B19                  | -0.816 |
| BI288843       |                                                              | -0.816 |
| BQ199066       | LOC287840; similar to RIKEN cDNA D030012E24 gene             | -0.819 |
| J02827         | Bckdha; branched chain keto acid dehydrogenase subunit E1, a | -0.822 |
| BF397241       | LOC309447; similar to Ldb1a                                  | -0.822 |
| AA851230       | LOC293673; similar to 2010003J03Rik protein                  | -0.828 |
| BQ210311       | LOC314176; similar to histone H2A.F/Z variant isoform 1; pur | -0.828 |
| AM:ARGI1-0514; |                                                              | -0.829 |
| AM:ARGI1-0209; |                                                              | -0.829 |
| AA900501       |                                                              | -0.829 |
| AA998660       |                                                              | -0.835 |
| NM_138827      | Slc2a1; solute carrier family 2,member 1                     | -0.835 |
| D14015         |                                                              | -0.835 |
| NM_022516      | Ptb; polypyrimidine tract binding protein                    | -0.840 |
| AA901338       | Eif2s2; eukaryotic translation initiation factor 2, subunit  | -0.841 |
| CA512849       |                                                              | -0.841 |
| BQ205814       | LOC292944; similar to RalBP1-associated EH domain protein Re | -0.841 |
| NM_017073      | Glns; glutamine synthetase 1                                 | -0.841 |
| BQ201170       | Znf297; zinc finger protein 297                              | -0.848 |
| AI411137       | LOC293779; similar to RIKEN cDNA A330009E03                  | -0.849 |
| BF393399       | LOC294513; similar to DnaJ (Hsp40) homolog, subfamily B, mem | -0.854 |
| AA875248       |                                                              | -0.854 |
| NM_031531      | Spin2c; Serine protease inhibitor                            | -0.854 |
| AI412054       | LOC300130; similar to chromosome 22 open reading frame 4; pu | -0.854 |
| NM_031235      | Par3; three-PDZ containing protein similar to C. elegans PAR | -0.854 |
| BE103914       |                                                              | -0.867 |
| BI286733       | LOC297480; similar to forkhead-related transcription factor  | -0.870 |
| NM_012930      | Cpt2; carnitine palmitoyltransferase 2                       | -0.873 |
| BE107173       |                                                              | -0.880 |
| CB605583       | LOC361968; similar to RIKEN cDNA 5730537D05 gene             | -0.880 |
| NM_031333      | Cdh2; cadherin 2                                             | -0.886 |
| BE113485       |                                                              | -0.886 |
| BQ211631       |                                                              | -0.886 |
| AW435397       | LOC307446; similar to putative DEIH-box RNA/DNA helicase     | -0.886 |
| BQ204060       |                                                              | -0.892 |

|           |                                                              |        |
|-----------|--------------------------------------------------------------|--------|
| H34492    | LOC316131; similar to sex-determination protein homolog Fem1 | -0.892 |
| AI070704  | LOC361212; similar to ring finger protein 44                 | -0.892 |
| BF282344  |                                                              | -0.899 |
| M63991    | Serpina7; serine (or cysteine) proteinase inhibitor, clade A | -0.899 |
| NM_024387 | Hmox2; heme oxygenase 2                                      | -0.899 |
| NM_024359 | Hif1a; hypoxia inducible factor 1, alpha subunit             | -0.899 |
| AI172313  |                                                              | -0.899 |
| BF283584  |                                                              | -0.905 |
| AW525201  |                                                              | -0.910 |
| NM_144746 | LOC246255; protein phosphatase 2A B regulatory subunit delta | -0.911 |
| BQ209194  | Slc35b2; solute carrier family 35, member B2                 | -0.912 |
| BF408421  | LOC288369; similar to RIKEN cDNA 1810022F11                  | -0.913 |
| AI102977  | LOC308224; similar to RIKEN cDNA 1110005N04                  | -0.918 |
| AI104522  |                                                              | -0.919 |
| BQ190160  |                                                              | -0.924 |
| BE113476  | LOC291080; hypothetical LOC291080                            | -0.924 |
| BG375338  |                                                              | -0.931 |
| CB545354  | LOC303369; similar to ligase III, DNA, ATP-dependent         | -0.931 |
| NM_031332 | Slc22a8; solute carrier family 22 ,member 8                  | -0.931 |
| AW532052  |                                                              | -0.936 |
| NM_057146 | C9; complement component 9                                   | -0.943 |
| NM_052980 | Nr1i2; nuclear receptor subfamily 1, group 1, member 2       | -0.943 |
| AI058968  |                                                              | -0.944 |
| BI298735  |                                                              | -0.950 |
| AI145892  | LOC304579; similar to 6330590F17Rik protein                  | -0.950 |
| AW528848  | LOC298490; similar to RIKEN cDNA 6330579B17 gene             | -0.956 |
| AI145455  | LOC291071; similar to ribonuclease P1                        | -0.956 |
| NM_031650 |                                                              | -0.956 |
| BE118720  | LOC363630; similar to KIAA0346                               | -0.956 |
| BF287291  | LOC315134; similar to RIKEN cDNA 1300006C06                  | -0.963 |
| NM_012770 | Gucy1b2; guanylate cyclase, soluble, beta 2                  | -0.969 |
| NM_013215 | Afar; aflatoxin B1 aldehyde reductase                        | -0.969 |
| BF558262  |                                                              | -0.969 |
| AA899907  | LOC300253; similar to Eukaryotic translation initiation fact | -0.975 |
| AW915681  |                                                              | -0.982 |
| AA859843  |                                                              | -0.988 |
| NM_130405 | Sam68; src associated in mitosis, 68 kDa                     | -0.988 |
| BF561261  |                                                              | -0.988 |
| AW523520  | LOC298546; similar to RIKEN cDNA 3110024A21                  | -0.992 |
| AI176879  |                                                              | -1.001 |
| AA848230  |                                                              | -1.001 |
| BQ195361  | LOC300982; similar to Dorz1                                  | -1.001 |
| BF282856  | LOC298091; similar to solute carrier family 31, member 2     | -1.007 |
| BI295378  | LOC293050; similar to alpha/beta hydrolase-2 fold protein    | -1.007 |
| NM_012988 | Nfia; nuclear factor I/A                                     | -1.009 |
| BF551324  | LOC362591; similar to heavy metal-responsiv etranscription f | -1.013 |
| AI013773  |                                                              | -1.013 |
| BQ207103  | LOC313729; similar to Mitogen-inducible gene 6 protein homol | -1.014 |
| BI294806  |                                                              | -1.014 |
| AA899721  |                                                              | -1.020 |
| BF562222  |                                                              | -1.021 |
| BG378237  | Ler3; immediate early response 3                             | -1.026 |

|           |                                                              |        |
|-----------|--------------------------------------------------------------|--------|
| AA997661  |                                                              | -1.026 |
| BE113362  | LOC289993; similar to cyclin-dependent kinase inhibitor 3; C | -1.026 |
| AA926036  |                                                              | -1.026 |
| BF411100  | LOC307217; similar to zinc finger protein                    | -1.026 |
| BQ209292  |                                                              | -1.033 |
| BF402924  |                                                              | -1.039 |
| NM_139258 | Bmf; Bcl-2 modifying factor                                  | -1.039 |
| AW527182  |                                                              | -1.039 |
| NM_053433 | Fmo3; flavin-containing monooxygenase 3                      | -1.045 |
| NM_133546 | Myd116; myeloid differentiation primary response gene 116    | -1.045 |
| BI298039  |                                                              | -1.052 |
| BF289687  |                                                              | -1.052 |
| NM_053524 | Nox4; NADPH oxidase 4                                        | -1.052 |
| NM_022867 | MPL3; microtubule-associated proteins 1A/1B light chain 3    | -1.058 |
| AW252158  | LOC362961; similar to Sad1/unc-84-like protein 2             | -1.058 |
| BF392982  |                                                              | -1.058 |
| NM_012524 | Cebpa; CCAAT/enhancer binding protein, alpha                 | -1.060 |
| BM391994  |                                                              | -1.064 |
| BQ209315  |                                                              | -1.064 |
| NM_024360 | Hes1; hairy and enhancer of split 1 (Drosophila)             | -1.064 |
| AI043678  |                                                              | -1.077 |
| NM_173094 | Hmgcs2; 3-hydroxy-3-methylglutaryl-Coenzyme A synthase 2     | -1.077 |
| NM_138888 | Loc192246; transcription factor INI                          | -1.084 |
| BI277629  | Usp2; ubiquitin specific protease 2                          | -1.084 |
| CB544426  |                                                              | -1.085 |
| BQ194083  | LOC304577; similar to uracil-DNA glycosylase                 | -1.087 |
| CA338881  |                                                              | -1.090 |
| AI010469  | LOC314148; similar to RIKEN cDNA 1200003C23                  | -1.090 |
| BI286562  | LOC316237; similar to RIKEN cDNA 0610009D16                  | -1.096 |
| CA506981  |                                                              | -1.103 |
| BI279017  | Per1; period 1                                               | -1.103 |
| AI179636  | LOC287274; similar to RIKEN cDNA 0610009B22                  | -1.103 |
| NM_031576 | Por; P450 (cytochrome) oxidoreductase                        | -1.109 |
| BQ205281  | LOC309161; similar to CG17265-PA                             | -1.115 |
| NM_057097 | Vamp3; vesicle-associated membrane protein 3                 | -1.115 |
| NM_022960 | Aqp9; aquaporin 9                                            | -1.122 |
| AI410339  | Il6st; interleukin 6 signal transducer                       | -1.128 |
| AW916104  | LOC300666; similar to KIAA0285 gene product                  | -1.128 |
| AW521764  | LOC363017; similar to RIKEN cDNA 4930553M18                  | -1.128 |
| AI501919  |                                                              | -1.135 |
| AI008890  | LOC287361; similar to D130067D09 protein                     | -1.135 |
| BE115041  |                                                              | -1.141 |
| BE117874  |                                                              | -1.147 |
| CA507161  | LOC293749; similar to MS4A6B protein                         | -1.154 |
| AA819133  |                                                              | -1.154 |
| NM_019194 | Tef; thyrotroph embryonic factor                             | -1.154 |
| CB579706  | LOC362398; similar to plexin 1                               | -1.154 |
| NM_017270 | Adh4; alcohol dehydrogenase 4 (class II), pi polypeptide     | -1.160 |
| AA924904  | LOC288933; similar to S-adenosylmethionine synthetase gamma  | -1.161 |
| BQ205363  | Fgfr1; fibroblast growth factor receptor-like 1              | -1.166 |
| CB546425  | LOC317599; similar to Potential phospholipid-transporting AT | -1.166 |
| NM_022594 | Ech1; enoyl coenzyme A hydratase 1                           | -1.171 |

|           |                                                              |        |
|-----------|--------------------------------------------------------------|--------|
| NM_012963 | Hmgb1; high mobility group box 1                             | -1.174 |
| BI293058  | LOC288264; similar to interferon alpha/beta receptor         | -1.179 |
| AI101181  |                                                              | -1.179 |
| BF560819  | LOC303177; similar to Histone H2A.1                          | -1.184 |
| BE116701  |                                                              | -1.186 |
| BQ207656  | LOC364069; similar to HLX                                    | -1.186 |
| BF389856  |                                                              | -1.192 |
| BQ192967  |                                                              | -1.198 |
| NM_022866 | Slc13a3; solute carrier family 13 (sodium-dependent dicarbox | -1.198 |
| BM385435  |                                                              | -1.205 |
| H31427    | LOC294754; similar to Pelo protein                           | -1.211 |
| AA817700  |                                                              | -1.211 |
| AI232081  |                                                              | -1.211 |
| BG375059  | LOC306030; similar to RIKEN cDNA 2410046H15                  | -1.217 |
| NM_053765 | Uae1; UDP-N-acetylglucosamine-2-epimerase/N-acetylmannosamin | -1.217 |
| AI600178  | LOC289402; similar to RIKEN cDNA 1210002B07                  | -1.224 |
| NM_031589 | G6pt1; glucose-6-phosphatase, transport protein 1            | -1.224 |
| AW433872  | LOC361116; similar to RIKEN cDNA 3110001I22                  | -1.230 |
| BQ190339  |                                                              | -1.237 |
| NM_040669 | Hps1; Hermansky-Pudlak syndrome 1 homolog (human)            | -1.237 |
| BF391476  |                                                              | -1.249 |
| BF556066  | LOC296913; similar to U6 snRNA-associated Sm-like protein LS | -1.256 |
| AI058985  |                                                              | -1.256 |
| BE109381  |                                                              | -1.256 |
| AW531805  | LOC309526; similar to This ORF is capable of encoding 404aa  | -1.259 |
| NM_021266 |                                                              | -1.262 |
| BF564203  | LOC317599; similar to Potential phospholipid-transporting AT | -1.262 |
| NM_012879 | Slc2a2; solute carrier family 2, member 2                    | -1.262 |
| NM_012601 | Mpg; N-methylpurine-DNA glycosylase                          | -1.262 |
| AW920530  | LOC360809; similar to B-cell CLL/lymphoma 7A                 | -1.266 |
| NM_019269 | Slc22a5; solute carrier family 22, member 5                  | -1.268 |
| BG373237  | LOC288353; similar to p20-CGGBP                              | -1.268 |
| AA900314  |                                                              | -1.275 |
| BI298478  |                                                              | -1.275 |
| NM_021750 | Csad; cysteine-sulfinate decarboxylase                       | -1.281 |
| NM_022589 | Tspan2; tetraspan 2                                          | -1.281 |
| NM_053445 | Fads1; fatty acid desaturase 1                               | -1.281 |
| AI237388  | LOC300994; similar to IRFD2                                  | -1.281 |
| AW525765  |                                                              | -1.288 |
| BQ207842  |                                                              | -1.288 |
| AI144958  | Svop; SV2 related protein                                    | -1.294 |
| AA892922  | LOC313551; similar to hypothetical protein MGC955            | -1.313 |
| CA507265  |                                                              | -1.313 |
| BE105762  |                                                              | -1.313 |
| BM387554  |                                                              | -1.319 |
| BQ783106  | LOC298003; similar to Galactose-1-phosphate uridylyltransfer | -1.326 |
| 1185280   |                                                              | -1.339 |
| BF417765  |                                                              | -1.340 |
| CB548442  |                                                              | -1.345 |
| NM_130747 | rACH; cytoplasmic acetyl-CoA hydrolase                       | -1.358 |
| BQ210515  | Hig1; hypoxia induced gene 1                                 | -1.358 |
| NM_133568 | Rasd2; RASD family, member 2                                 | -1.358 |

|           |                                                              |        |
|-----------|--------------------------------------------------------------|--------|
| CB545511  | LOC307897; similar to RIKEN cDNA 4632417N05                  | -1.364 |
| NM_053754 | Abcg5; ATP-binding cassette, sub-family G (WHITE), member 5  | -1.364 |
| CA509805  | LOC312372; similar to BTB and kelch domain containing protei | -1.367 |
| BQ211689  | LOC310653; similar to 60S ribosomal protein L9, mitochondria | -1.377 |
| AA955932  |                                                              | -1.377 |
| BQ190877  | LOC303683; similar to ring finger B-box coiled-coil protein, | -1.396 |
| NM_133547 | Sult1c2; sulfotransferase family, cytosolic, 1C, member 2    | -1.396 |
| AI716185  | LOC304887; Ral-A exchange factor RalGPS2                     | -1.409 |
| AI237073  | LOC300862; similar to PLK interacting protein                | -1.409 |
| AA924717  | LOC362618; similar to hypothetical protein BC008163          | -1.415 |
| AI598321  | Npap60; nuclear pore associated protein                      | -1.418 |
| CB546924  |                                                              | -1.432 |
| NM_134449 | Prkcdbp; PKC-delta binding protein                           | -1.434 |
| AI406802  |                                                              | -1.434 |
| NM_019242 | lfrd1; interferon-related developmental regulator 1          | -1.453 |
| BE111720  |                                                              | -1.460 |
| BF415281  |                                                              | -1.472 |
| BE108086  | LOC299700; similar to hypothetical protein MGC40397          | -1.478 |
| NM_031742 | Kcnh1; potassium voltage-gated channel, subfamily H (eag-rel | -1.479 |
| AA923984  |                                                              | -1.492 |
| BI297041  | LOC293057; similar to junction-mediating and regulatory prot | -1.504 |
| NM_017020 | Il6r; interleukin 6 receptor                                 | -1.504 |
| BI303289  |                                                              | -1.523 |
| BE349717  | LOC311088; similar to cobl-related 1                         | -1.530 |
| AA923852  |                                                              | -1.535 |
| AW143731  |                                                              | -1.543 |
| NM_031732 | Sult1a2; sulfotransferase family 1A, member 2                | -1.549 |
| NM_017305 | Gclm; glutamate cysteine ligase, modifier subunit            | -1.549 |
| NM_153312 | Cyp3a2; testosterone 6-beta-hydroxylase                      | -1.559 |
| NM_052809 | Cdo1; cytosolic cysteine dioxygenase 1                       | -1.562 |
| BQ207708  |                                                              | -1.567 |
| NM_053536 | Klf15; Kruppel-like factor 15                                | -1.568 |
| NM_017149 | Meox2; mesenchyme homeo box 2                                | -1.573 |
| NM_031775 | Casp6; caspase 6                                             | -1.587 |
| AI172479  | LOC304488; similar to T-cell activation protein phosphatase  | -1.587 |
| BE096055  |                                                              | -1.600 |
| AI228265  | Gpr48; G protein-coupled receptor 48                         | -1.600 |
| AI408727  | LOC362535; similar to DNA segment, Chr 4, Brigham & Womens G | -1.607 |
| BU759048  | LOC298654; similar to 5730438N18Rik protein                  | -1.613 |
| NM_138905 | Dri42; ER transmembrane protein Dri 42                       | -1.619 |
| NM_012833 | Abcc2; ATP-binding cassette, sub-family C (CFTR/MRP), member | -1.625 |
| NM_022602 | Pim3; serine threonine kinase pim3                           | -1.625 |
| AW916210  |                                                              | -1.645 |
| NM_031579 | Ptp4a1; protein tyrosine phosphatase 4a1                     | -1.645 |
| NM_133303 | Bhlhb3; basic helix-loop-helix domain containing, class B3   | -1.651 |
| AI101841  |                                                              | -1.657 |
| AI228244  |                                                              | -1.664 |
| NM_032082 | Hao3; hydroxyacid oxidase (glycolate oxidase) 3              | -1.676 |
| BI292657  | Rbm3; RNA binding motif protein 3                            | -1.676 |
| BM385851  | Per1; period 1                                               | -1.683 |
| BF566642  |                                                              | -1.683 |
| BQ202118  | ErbB3; avian erythroblastosis oncogene B 3                   | -1.683 |

|           |                                                              |        |
|-----------|--------------------------------------------------------------|--------|
| AI176590  | LOC299982; similar to RIKEN cDNA C730048E16                  | -1.683 |
| NM_053955 | Crym; crystallin, mu                                         | -1.689 |
| NM_032615 | Mir16; membrane interacting protein of RGS16                 | -1.689 |
| AI411073  |                                                              | -1.696 |
| BE106694  | LOC304669; similar to hook homolog 2                         | -1.700 |
| NM_012889 | Vcam1; vascular cell adhesion molecule 1                     | -1.702 |
| NM_021835 | Jun; v-jun sarcoma virus 17 oncogene homolog (avian)         | -1.708 |
| BI289351  | LOC315994; similar to Expressed sequence AI874665            | -1.708 |
| X63594    |                                                              | -1.727 |
| AI556632  |                                                              | -1.727 |
| BI290606  |                                                              | -1.734 |
| BG375921  |                                                              | -1.740 |
| AW523954  |                                                              | -1.740 |
| AI409142  | LOC295157; similar to KIAA0922 protein                       | -1.747 |
| AI231301  | LOC289827; similar to uridindiphosphoglucosepyrophosphorylas | -1.747 |
| BF563348  | LOC245926; RNA binding motif protein 16                      | -1.759 |
| BM388440  | LOC308543; similar to RIKEN cDNA 1810013P09                  | -1.766 |
| NM_019186 | Arl4; ADP-ribosylation-like 4                                | -1.766 |
| BG375318  |                                                              | -1.778 |
| AI233877  |                                                              | -1.778 |
| AI235590  | LOC366262; similar to SEB4                                   | -1.804 |
| BE099763  | LOC361810; similar to FKBP51                                 | -1.836 |
| AI045814  | Vnn1; vanin 1                                                | -1.836 |
| BG381426  |                                                              | -1.861 |
| AI175366  | LOC302913; similar to CG4768-PA                              | -1.880 |
| NM_031700 | Cldn3; claudin 3                                             | -1.957 |
| BI296950  | LOC300719; similar to calcium binding protein Kip 2          | -1.963 |
| M33936    | Cyp4a3; cytochrome P450, family 4, subfamily a, polypeptide  | -1.963 |
| BF395101  |                                                              | -1.970 |
| NM_017166 | Stmn1; stathmin 1                                            | -1.970 |
| BI284261  | LOC310395; similar to carbon catabolite repression 4 protein | -1.976 |
| BI282744  | Pck1; phosphoenolpyruvate carboxykinase 1                    | -2.001 |
| NM_031135 | Tieg; TGFB inducible early growth response                   | -2.040 |
| NM_053769 | Ptpn16; protein tyrosine phosphatase, non-receptor type 16   | -2.040 |
| AI409324  | LOC315326; similar to Tenc1 protein                          | -2.052 |
| NM_024356 | Gch; GTP cyclohydrolase 1                                    | -2.065 |
| CA512847  | LOC361074; similar to RIKEN cDNA 4933433D23                  | -2.084 |
| NM_024127 | Gadd45a; growth arrest and DNA-damage-inducible 45 alpha     | -2.097 |
| AA817956  |                                                              | -2.110 |
| BG378291  |                                                              | -2.116 |
| NM_031327 | Cyr61; cysteine rich protein 61                              | -2.123 |
| NM_031605 | Cyp4a12; cytochrome P450, 4a12                               | -2.142 |
| BI275243  | LOC294754; similar to Pelo protein                           | -2.142 |
| NM_054011 | Sh3bp5; SH3-domain binding protein 5 (BTK-associated)        | -2.154 |
| BF550197  |                                                              | -2.180 |
| NM_024385 | Hhex; hematopoietically expressed homeobox                   | -2.193 |
| NM_139334 | Besh3; brain-enriched SH3-domain protein Besh3               | -2.250 |
| AA858882  | Zfp36; zinc finger protein 36                                | -2.276 |
| CA507280  |                                                              | -2.307 |
| NM_012816 | Amacr; alpha-methylacyl-CoA racemase                         | -2.333 |
| AW529678  | LOC315023; similar to mitochondrial folate transporter/carri | -2.365 |
| BF556693  |                                                              | -2.499 |

|           |                                                              |        |
|-----------|--------------------------------------------------------------|--------|
| AI010919  |                                                              | -2.543 |
| NM_030832 | Fabp7; fatty acid binding protein 7                          | -2.601 |
| CB547935  | LOC303553; similar to RhoN                                   | -2.633 |
| BM390716  |                                                              | -2.639 |
| AI102097  | LOC313977; similar to Kiaa0575                               | -2.664 |
| BF419904  | LOC291005; similar to GROWTH ARREST AND DNA-DAMAGE-IND       | -2.671 |
| BI296028  |                                                              | -2.766 |
| BM385405  | Usp2; ubiquitin specific protease 2                          | -2.792 |
| AI105070  | LOC307395; similar to KIAA0843 protein                       | -2.824 |
| BI281856  |                                                              | -2.868 |
| AF249673  | Slc38a2; solute carrier family 38, member 2                  | -2.881 |
| NM_057133 | Nr0b2; nuclear receptor subfamily 0, group B, member 2       | -3.168 |
| NM_019340 | Rgs3; regulator of G-protein signaling 3                     | -3.168 |
| AI235446  |                                                              | -3.244 |
| NM_053968 | Mt3; metallothionein 3                                       | -3.283 |
| BF549592  | LOC362039; similar to group XII-1 phospholipase A2           | -3.315 |
| NM_144755 | LOC246273; kinase                                            | -3.359 |
| BE114208  |                                                              | -3.366 |
| NM_145677 | Pcscl; peroxisomal Ca-dependent solute carrier-like protein  | -3.461 |
| NM_052798 | Znf354a; zinc finger protein 354A                            | -3.519 |
| BI277389  | Pck1; phosphoenolpyruvate carboxykinase 1                    | -3.538 |
| AI170446  |                                                              | -3.550 |
| NM_031241 | Cyp8b1; cytochrome P450, 8b1, sterol 12 alpha-hydrolase      | -3.550 |
| NM_053523 | Herpud1; homocysteine-inducible, endoplasmic reticulum stres | -3.576 |
| BF401557  | Maib; v-maf musculoaponeurotic fibrosarcoma oncogene family, | -3.601 |
| BF398158  |                                                              | -3.621 |
| AA875256  |                                                              | -3.621 |
| AW252132  |                                                              | -3.710 |
| AI012106  |                                                              | -4.513 |
| AA859114  |                                                              | -4.781 |
| NM_053962 | Sds; serine dehydratase                                      | -4.844 |
| NM_031559 | Cpt1a; carnitine palmitoyltransferase 1, liver               | -4.844 |
| NM_057211 | Klf9; Kruppel-like factor 9                                  | -5.227 |
| BQ210017  |                                                              | -6.062 |
| NM_138826 | Mt1a; Metallothionein                                        | -6.610 |
| BF284190  |                                                              | -6.629 |
| NM_012543 | Dbp; D site albumin promoter binding protein                 | -6.986 |
| BF556648  |                                                              | -8.395 |
